# Supplementary material for: Economic Evaluation in Global Perspective: A Bibliometric Analysis of the Recent Literature
Source: PubMed Central journal article supplement (PMC5042080; doi:10.1002/hec.3305), 2016-01-25
Supplement: HEC-25-9-s001.pdf [file HEC-25-9-s001.pdf]

## **SUPPLEMENTARY MATERIALS**

### **Economic evaluation in global perspective: A bibliometric analysis of the recent literature**

PITT, C., GOODMAN, C. & HANSON, K. 2016. Economic evaluation in global perspective: A bibliometric analysis of the recent literature. *Health Economics*, **25** (Suppl. S1).

#### **Contents**

##### **SUPPLEMENTARY FIGURE**

**Figure S1** Flow diagram of the data development process

##### **SUPPLEMENTARY TEXT**

**Text S1** A note on database indexing terms

**Text S2** Supplementary information on article classification

##### **SUPPLEMENTARY TABLES**

**Table S1** Searches in bibliographic databases

**Table S2** Mapping of 25 disease areas onto the Global Burden of Disease (GBD), International Classification of Disease (ICD-10), and search terms used

**Table S3** Classification of journal types

**Table S4** Search terms to classify cost-utility and cost-benefit analyses

**Table S5** Search findings by database – all articles and databases

**Table S6** Search findings by database – excluding NHS EED and Wiley HEED

**Table S7** Search findings by database – only articles studying low- and middle-income countries, excluding NHS EED and Wiley HEED

**Table S8** Journal concentration by income group of countries studied

**Table S9** Number and proportion of economic evaluations by type and income group

#### **References**

**Figure S1 Flow diagram of the data development process**

The figure is adapted from the flow diagram recommended in the PRISMA statement on systematic reviews (Liberati et al., 2009). The “eligibility” stage recommended by PRISMA is not used here as articles were not reviewed for quality; decisions to include records were based primarily on the record’s source, title, and abstract; the full text was only screened where the title was unclear and the abstract was not available in any of the downloaded data.

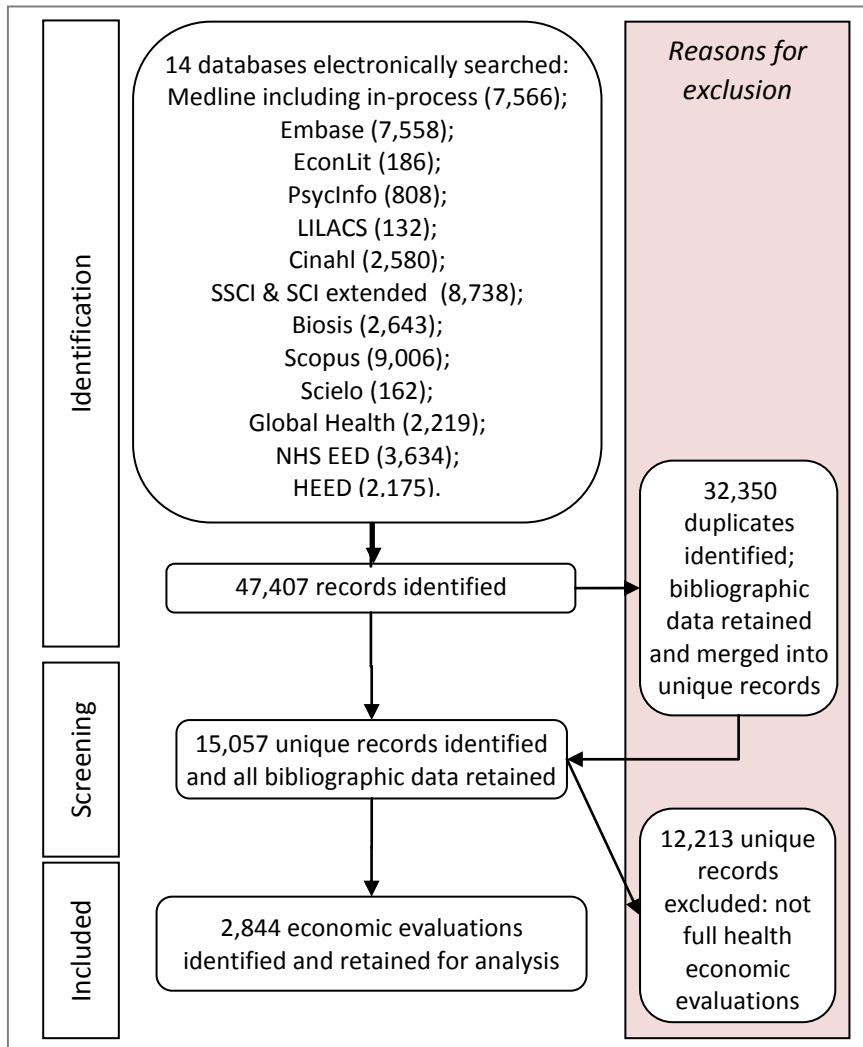

### Text S1 A note on database indexing terms

In developing our search strategy, we explored the use of controlled vocabulary indexing terms, if available, in each of the databases; unlike author-defined keywords, these terms are generally applied to publications by professional indexers from a pre-defined set. While this standardization should offer advantages, one drawback is the delays in their application; while many of the databases offer basic citation data as supplied by the journal first, indexing takes more time and so searches based exclusively on indexing terms will exclude the most recent literature, to which index terms have not yet been applied.

In Medline and Embase, indexing terms are known as medical subject headings (MeSH) and Emtree (which is not an acronym), respectively; both are organized hierarchically. While the only MeSH term relevant to our search is “cost-benefit analysis”, Emtree appears much more detailed and appropriate, as it distinguishes “cost effectiveness analysis”, “cost utility analysis”, and “cost benefit analysis” from “cost control”, “cost minimization analysis”, and “cost of illness” within the broader indexing term “economic evaluation.” When we compared the results of our searches in the title, abstract, and author-defined keywords for the key terms we identified above with the results of searches using MeSH terms (in Medline) and Emtree terms (in Embase), we found that the controlled vocabulary terms were both less specific and less sensitive. Our search terms identified many relevant articles missed by the MeSH and Emtree indexers. By contrast, the controlled vocabulary terms greatly increased the number of search results, but a review of the first hundred records identified by the MeSH term and, separately, by each of the three Emtree terms (i.e. 400 records in total) after excluding records identified by our search terms identified only one additional article meeting our inclusion criteria (identified by the Emtree term “cost-effectiveness analysis”). We used this article to develop an additional set of search terms (based on “cost per x”) and concluded that the MeSH and Emtree BM indexing terms were not useful for our final searches, as they identified a vast number of articles, many of which contained no cost or other economic data or analysis, while omitting many relevant publications.

Another database applying its own indexing is HEED. On the “compound search” page, HEED offers “type of econ eval” as a search category, as well as a “type of article”. While the associated picklist does not make this obvious, HEED in fact categorizes economic evaluations as “cost effectiveness analysis”, “cost utility analysis”, “cost benefit analysis”, “cost analysis”, “cost of illness”, “cost benefit analysis”, and “cost consequences analysis”; it allows a single record to be classified as multiple types of economic evaluation, allows the user to specify only “applied study” as the “type of article”, and reports that its indexers are professional health economists. After examining this classification, we found that the terms for CEA, CUA, and CBA were highly specific and useful when combined with “applied study” as type of study, however, many publications in the HEED database were not classified at all, making the search relatively insensitive even within the HEED database. In HEED, we therefore implemented two separate searches: 1) using the HEED classification of the type of economic evaluation, and 2) using our search terms in the title, abstract, and author-defined keywords, and excluding records containing the specified categories, such that any records identified by this search would be additional to records identified by the use of HEED’s indexing.

The EconLit database uses the Journal of Economic Literature (JEL) classification system, however, unlike the indexing systems previously described, JEL codes are applied by the authors themselves. They break down the wider health economics field into 6 specified sub-fields, none of which mention in their descriptions or examples either applied or methodological work in economic evaluation; “general” and “other” health economics categories are also provided. On reviewing a

selection of health economic evaluations in the EconLit database identified by title and abstract searches, we found that while some authors combine the codes “D61: Allocative Efficiency; Cost-benefit analysis” (within the microeconomics heading) and “I12: Health Production” (within the health economics heading), other authors did not use these codes at all, choosing instead a wide variety of other codes within the health, microeconomics, and “miscellaneous” headings in particular, as well as others. Rather than using the JEL codes, we therefore decided to take a more sensitive approach in EconLit, and instead searched for “health” in all fields, which would capture the word “health” in JEL codes, but also in journal title, keywords, article title, or abstract; we combined this with keyword searches for our definition of economic evaluation.

## Text S2 Supplementary information on article classification

### Health areas

We developed a classification of 25 health areas so as to allow comparability with the Global Burden of Disease (GBD) estimates (World Health Organization., 2014), to be implementable with an electronic key term search, and to permit meaningful analysis. The GBD uses four hierarchical levels to classify disease. At its highest level, it classifies diseases as “Communicable, maternal, perinatal and nutritional conditions”, “Non-communicable diseases” or “Injuries”, while at its lowest levels, it breaks these down into 154 more specific conditions. We did not maintain the GBD’s highest level classification because in some cases, it was not implementable (e.g. key term searches could not distinguish between communicable and non-communicable causes of respiratory diseases) and in other cases, we felt the distinction did not map coherently onto preventive and curative interventions (e.g. we separated “intentional injuries: self harm” from other injury categories and placed it in a single category with mental health issues).

A set of up to 49 search terms was developed for each of our health areas through an iterative process. We began by reviewing the names of sub-categories in the GBD and the categories and descriptions provided in the ICD-10 (World Health Organization., 2011) to develop an initial set of search terms. We then reviewed the titles and keywords of unclassified records in our database, and continued adding search terms until all records in our database which could be classified were classified according to at least one health area. Throughout the process, we reviewed samples of records within each health area, and reviewed in-depth the records identified by search terms we considered potentially ambiguous, before finalizing our search terms and disease classification.

### Institutional and geographic affiliations of authors

We analyzed data on the institutional affiliation of all authors to develop a comprehensive picture of the institutions and countries contributing to health economic evaluations. We began by transferring the institutional affiliation data from wide to long form and implementing the country keyword searches previously developed. As affiliation data frequently did not name a country, unclassified affiliations were then iteratively reviewed and search terms for city names and non-geographic institution names (e.g. Harvard, Yale) were identified and linked to countries, taking care to avoid misclassifying search terms such as “York”, which could refer to the city (York) or county (Yorkshire) in the United Kingdom, to York University in Canada, or to the city or state of New York in the United States. In this way, nearly all articles for which affiliation data were available were classified as being produced by researchers in one or more specified countries. This data was further cross-checked against the data on countries studied and inconsistencies reviewed. The original articles were sought to resolve inconsistencies and to obtain institutional affiliation data for any articles remaining without data. Articles were then classified by the income group of the country or countries of the author affiliations and the countries producing the greatest volume of economic evaluations were ranked within each income group.

We further identified the top ten institutions within each income group by volume of economic evaluations produced. The affiliation data for top-ranked countries within each income group were carefully reviewed to develop sets of specific key terms for institutions. As in previous work (Wagstaff and Culyer, 2012, Rubin and Chang, 2003), schools, colleges and institutes were aggregated with the university to which they belonged, with the exception of the highly federal Universities of London, California, Texas, and other similar university systems, whose constituent members were analyzed separately. To the extent possible, hospitals and institutes were associated

with their parent institution, even when that institution was not explicitly named. Even though they are independently owned and managed, Harvard's 16 affiliated hospitals were aggregated with Harvard. Once an initial set of ten institutions were identified for each income group, only affiliations from countries which had produced more than the tenth-ranked institution for that income group were reviewed to identify institutions which could have produced more economic evaluations than the currently tenth-ranked institution. For example, the tenth-ranked UMIC institution, the *Instituto Mexicano del Seguro Social*, produced 7 economic evaluations, and so only affiliations from UMICs which had produced at least 7 economic evaluations were reviewed to identify individual institutions which could have produced at least this number. The searches for city names were then used to facilitate the identification of institutions.

In addition, search terms were developed for international and inter-governmental organizations, such as United Nations agencies and the World Bank, and for multi-national pharmaceutical companies, regardless of the country, if any, with which they were associated in their affiliation data. These were then aggregated into two groups, "international organizations" and "pharmaceutical industry", to permit consideration of their relative influence.

This process allowed a comprehensive assessment of the total volume of articles produced by each country and by income group, as well as a comprehensive assessment of top institutions, taking into account the many and unpredictable variations in their listing. Less thorough approaches would be likely to bias rankings towards institutions such as Yale, with its unique name which also appears in the name of all its constituent schools and hospital, and away from institutions with a wider variety of permutations, abbreviations and possibly ambiguous versions of its name, such as the University of York (Univ York, U York, but not York University), with Hull-York Hospital (Hull-York Hosp), which were not always listed with the university name in the affiliation data.

We considered a number of possible approaches for analysing articles with more than one institutional affiliation. Both Wagstaff and Culyer (2012) and Rubin and Chang (2003) were constrained by the EconLit database, which only provides data on the first three or four authors, whereas we obtained institutional affiliation data for all authors. We considered assigning a fractional value (and even weighted fractional values reflecting author order) to each institution based on the number of different authors or institutions represented on a given article (Aksnes et al., 2012, Hagen, 2013, Retzer and Jurasinski, 2009). However, we rejected such approaches for two reasons: first, we believe that the use of zero-sum metrics establishes a perverse incentive against collaboration between institutions and against the crediting of collaborators. We therefore assigned one point per institution per article, regardless of the number of institutions or authors on a given article. This has the disadvantage of weighting the analysis towards articles from multiple institutions, as these articles are counted multiple times.

Table S1 Searches in bibliographic databases

| Database (Interface)                                                                                                                                                                                   | Search                                                                                                                                                                                                                                                                                                                                                                                                                                                                                                                                                                                                                                                                                                                                                                                                                                                                                                                                                                                                                                                                                                                                                                                                                                                                                                                                                                                                                                                                                                                                                                                        |
|--------------------------------------------------------------------------------------------------------------------------------------------------------------------------------------------------------|-----------------------------------------------------------------------------------------------------------------------------------------------------------------------------------------------------------------------------------------------------------------------------------------------------------------------------------------------------------------------------------------------------------------------------------------------------------------------------------------------------------------------------------------------------------------------------------------------------------------------------------------------------------------------------------------------------------------------------------------------------------------------------------------------------------------------------------------------------------------------------------------------------------------------------------------------------------------------------------------------------------------------------------------------------------------------------------------------------------------------------------------------------------------------------------------------------------------------------------------------------------------------------------------------------------------------------------------------------------------------------------------------------------------------------------------------------------------------------------------------------------------------------------------------------------------------------------------------|
| <p><b>National Health Service Economic Evaluation Database (Centre for Reviews and Dissemination)</b></p> <p><i>Note: this database is still available, however, updating ceased in March 2015</i></p> | <p>NHS EED: tick box (DARE: blank, HTA: blank)<br/>           Publication year: 2012 to 2014</p> <p>Export: "Full record" → produces a single RIS document with consecutively numbered records</p>                                                                                                                                                                                                                                                                                                                                                                                                                                                                                                                                                                                                                                                                                                                                                                                                                                                                                                                                                                                                                                                                                                                                                                                                                                                                                                                                                                                            |
| <p><b>Health Economic Evaluations Database (Wiley)</b></p> <p><i>Note: this database ceased to be available from the end of 2014.</i></p>                                                              | <p><b>Search 1: Identifies studies already reviewed and categorized by HEED</b><br/>           Search type (from purple button on left): Compound Search<br/>           Use pull-down menus to select:<br/>             Journal Date   &gt;= 2012   AND  <br/>            Type of Econ eval   'EFFECTIVENESS' Or 'UTILITY' Or 'BENEFIT'   AND  <br/>             Type of Article   'APPLIED'  </p> <p><b>Search 2: Identifies additional studies not yet reviewed and categorized by HEED</b><br/>           Search type (from purple button on left): Expert Search</p> <ol style="list-style-type: none"> <li>1. EE= 'EFFECTIVENESS' Or 'UTILITY' Or 'BENEFIT' AND TE= 'APPLIED' AND JD&gt;= 2012</li> <li>2. TI='Cost-effective*' OR 'Cost-Utility' OR 'Cost-benefit' OR 'Cost effective*' OR 'Cost Utility' OR 'Cost benefit' OR 'economic evaluation' AND (JD&gt;= 2012 )</li> <li>3. AB='Cost-effectiveness' OR 'Cost-Utility' OR 'Cost-benefit' OR 'Cost effectiveness' OR 'Cost Utility' OR 'Cost benefit' OR 'economic evaluation' AND (JD&gt;= 2012 )</li> <li>4. KW='Cost-effectiveness' OR 'Cost-Utility' OR 'Cost-benefit' OR 'Cost effectiveness' OR 'Cost Utility' OR 'Cost benefit' OR 'economic evaluation' AND (JD&gt;= 2012 )</li> <li>5. AB='cost per death averted' or 'cost per death avoided' or 'cost per case averted' or 'cost per case avoided' or 'cost per infection' or 'cost per life' or 'cost per disability-adjusted' or 'cost per quality-adjusted' or 'cost per qaly' or 'cost per daly'</li> <li>6. CS = LINE 1 OR LINE 2 OR LINE 3 OR LINE 5</li> </ol> |
| <p><b>LILACS (Bireme/WHO/PAHO)</b></p>                                                                                                                                                                 | <p>cost-effective or "cost effective" or cost-effectiveness or "cost effectiveness" or cost-utility or "cost utility" or cost-benefit or "cost benefit" or "economic evaluation" or "cost per death" or "cost per case" or "cost per infection" or "cost per life" or "cost per disability adjusted" or "cost per quality adjusted" or "cost per disability-adjusted" or "cost per quality-adjusted" or "cost per qaly" or "cost per</p>                                                                                                                                                                                                                                                                                                                                                                                                                                                                                                                                                                                                                                                                                                                                                                                                                                                                                                                                                                                                                                                                                                                                                      |

|                                                 |                                                                                                                                                                                                                                                                                                                                                                                                                                                                                                                                                                                                                                                                                                                                                                                                                                                                                                                                                                                                                                                                                                 |
|-------------------------------------------------|-------------------------------------------------------------------------------------------------------------------------------------------------------------------------------------------------------------------------------------------------------------------------------------------------------------------------------------------------------------------------------------------------------------------------------------------------------------------------------------------------------------------------------------------------------------------------------------------------------------------------------------------------------------------------------------------------------------------------------------------------------------------------------------------------------------------------------------------------------------------------------------------------------------------------------------------------------------------------------------------------------------------------------------------------------------------------------------------------|
|                                                 | daly" [Words]<br>and<br>2012 or 2013 or 2014 [Country, year publication]<br>and<br>not study and protocol [Title words]                                                                                                                                                                                                                                                                                                                                                                                                                                                                                                                                                                                                                                                                                                                                                                                                                                                                                                                                                                         |
| <b>ADOLEC<br/>(Bireme/WHO/PAHO)</b>             | cost-effective or "cost effective" or cost-effectiveness or "cost effectiveness" or cost-utility or "cost utility" or cost-benefit or "cost benefit" or "economic evaluation" or "cost per death" or "cost per case" or "cost per infection" or "cost per life" or "cost per disability adjusted" or "cost per quality adjusted" or "cost per disability-adjusted" or "cost per quality-adjusted" or "cost per qaly" or "cost per daly" [Words]<br>and<br>2012 or 2013 or 2014 [Country, year publication]<br>and not<br>study and protocol [Title words]                                                                                                                                                                                                                                                                                                                                                                                                                                                                                                                                       |
| <b>Medline (including in-process) (Ovid SP)</b> | 1. ("2012" or "2013" or "2014").yr.<br>2. (cost-effectiveness or cost-utility or cost-benefit or "economic evaluation").ti,ab,kw.<br>3. cost-effective.ti.<br>4. ("cost-per-death-av*" or "cost-per-case-av*" or "cost-per-infection" or "cost-per-life" or "cost-per-disability-adjusted-life-year" or "cost-per-quality-adjusted-life-year" or "cost-per-qaly" or "cost-per-daly").ti,ab,kw.<br>5. 2 or 3 or 4<br>6. 1 and 5<br>7. limit 6 to (autobiography or bibliography or biography or case reports or classical article or comment or congresses or consensus development conference or consensus development conference, nih or editorial or festschrift or guideline or historical article or in vitro or interactive tutorial or interview or lectures or letter or news or newspaper article or patient education handout or practice guideline or published erratum or technical report or twin study or video-audio media or webcasts)<br>8. 6 not 7<br>9. limit 8 to animals<br>10. limit 9 to human<br>11. 9 not 10<br>12. 8 not 11<br>13. study protocol.ti.<br>14. 12 not 13 |
| <b>Embase (Ovid SP)</b>                         | 1. ("2012" or "2013" or "2014").yr.<br>2. (cost-effectiveness or cost-utility or cost-benefit or "economic evaluation").ti,ab,kw.<br>3. cost-effective.ti.<br>4. ("cost-per-death-av*" or "cost-per-case-av*" or "cost-per-infection" or "cost-per-life" or "cost-per-disability-adjusted-life-year" or "cost-per-quality-adjusted-life-year" or "cost-per-qaly" or "cost-per-daly").ti,ab,kw.<br>5. 2 or 3 or 4<br>6. 1 and 5<br>7. limit 6 to (book or book series or conference abstract or conference paper or conference proceeding or "conference review" or                                                                                                                                                                                                                                                                                                                                                                                                                                                                                                                              |



|                                |                                                                                                                                                                                                                                                                                                                                                                                                                                                                                                                                                                                                                                                                                                                                                                                                                                                                                                                                                                                                                    |
|--------------------------------|--------------------------------------------------------------------------------------------------------------------------------------------------------------------------------------------------------------------------------------------------------------------------------------------------------------------------------------------------------------------------------------------------------------------------------------------------------------------------------------------------------------------------------------------------------------------------------------------------------------------------------------------------------------------------------------------------------------------------------------------------------------------------------------------------------------------------------------------------------------------------------------------------------------------------------------------------------------------------------------------------------------------|
|                                | <p>editorial or erratum or letter or note or report)</p> <p>8. 6 not 7</p> <p>9. limit 8 to (animals or animal studies)</p> <p>10. limit 9 to humans</p> <p>11. 9 not 10</p> <p>12. 8 not 11</p> <p>13. study protocol.ti.</p> <p>14. 12 not 13</p>                                                                                                                                                                                                                                                                                                                                                                                                                                                                                                                                                                                                                                                                                                                                                                |
| <b>EconLit (Ovid SP)</b>       | <p>1. ("2012" or "2013" or "2014").yr.</p> <p>2. health.af.</p> <p>3. (cost-effective* or cost-utility or cost-benefit or "economic evaluation").af.</p> <p>4. ("cost-per-death-av*" or "cost-per-case-av*" or "cost-per-infection" or "cost-per-life" or "cost-per-disability-adjusted-life-year" or "cost-per-quality-adjusted-life-year" or "cost-per-qaly" or "cost-per-daly").af.</p> <p>5. 3 or 4</p> <p>6. 1 and 2 and 5</p> <p>7. study protocol.ti.</p> <p>8. limit 6 to (books or book reviews or collective volume articles or dissertations)</p> <p>9. 6 not 8</p> <p>10. limit 9 to working papers</p> <p>11. 9 not 10</p>                                                                                                                                                                                                                                                                                                                                                                            |
| <b>PsycInfo(Ovid SP)</b>       | <p>1. ("2012" or "2013" or "2014").yr.</p> <p>2. (cost-effectiveness or cost-utility or cost-benefit or "economic evaluation").mp. [mp=title, abstract, heading word, table of contents, key concepts, original title, tests &amp; measures]</p> <p>3. cost-effective.ti.</p> <p>4. ("cost-per-death-av*" or "cost-per-case-av*" or "cost-per-infection" or "cost-per-life" or "cost-per-disability-adjusted-life-year" or "cost-per-quality-adjusted-life-year" or "cost-per-qaly" or "cost-per-daly").ti,ab,kw.</p> <p>5. 2 or 3 or 4</p> <p>6. 1 and 5</p> <p>7. limit 6 to ("0200 book" or "0240 authored book" or "0280 edited book" or "0300 encyclopedia" or "0400 dissertation abstract" or "column/opinion" or "comment/reply" or dissertation or editorial or encyclopedia entry or "erratum/correction" or letter or obituary)</p> <p>8. 6 not 7</p> <p>9. limit 8 to animal</p> <p>10. limit 9 to human</p> <p>11. 9 not 10</p> <p>12. 8 not 11</p> <p>13. study protocol.ti.</p> <p>14. 12 not 13</p> |
| <b>Global Health (Ovid SP)</b> | <p>1. ("2012" or "2013" or "2014").yr.</p> <p>2. (cost-effectiveness or cost-utility or cost-benefit or "economic evaluation").af.</p>                                                                                                                                                                                                                                                                                                                                                                                                                                                                                                                                                                                                                                                                                                                                                                                                                                                                             |

|                                                                                             |                                                                                                                                                                                                                                                                                                                                                                                                                                                                                                                                                                                                                                                                                                                                                                                                                                                                                                                                                                                                                                                                                                                                                                                                                                                                                                                                                                                                                                                                                                                                                                                                                                                                                                                                                                                                                                                                                                                                                                                                                                                                                                                                                                                                     |
|---------------------------------------------------------------------------------------------|-----------------------------------------------------------------------------------------------------------------------------------------------------------------------------------------------------------------------------------------------------------------------------------------------------------------------------------------------------------------------------------------------------------------------------------------------------------------------------------------------------------------------------------------------------------------------------------------------------------------------------------------------------------------------------------------------------------------------------------------------------------------------------------------------------------------------------------------------------------------------------------------------------------------------------------------------------------------------------------------------------------------------------------------------------------------------------------------------------------------------------------------------------------------------------------------------------------------------------------------------------------------------------------------------------------------------------------------------------------------------------------------------------------------------------------------------------------------------------------------------------------------------------------------------------------------------------------------------------------------------------------------------------------------------------------------------------------------------------------------------------------------------------------------------------------------------------------------------------------------------------------------------------------------------------------------------------------------------------------------------------------------------------------------------------------------------------------------------------------------------------------------------------------------------------------------------------|
|                                                                                             | <p>3. cost-effective.ti.<br/> 4. ("cost-per-death-av*" or "cost-per-case-av*" or "cost-per-infection" or "cost-per-life" or "cost-per-disability-adjusted-life-year" or "cost-per-quality-adjusted-life-year" or "cost-per-qaly" or "cost-per-daly").af.<br/> 5. 2 or 3 or 4<br/> 6. 1 and 5<br/> 7. limit 6 to (annual report or annual report section or book or book chapter or bulletin or conference or conference proceedings or conference paper or correspondence or editorial or patent or thesis)<br/> 8. 6 not 7<br/> 9. study protocol.ti.<br/> 10. 8 not 9</p>                                                                                                                                                                                                                                                                                                                                                                                                                                                                                                                                                                                                                                                                                                                                                                                                                                                                                                                                                                                                                                                                                                                                                                                                                                                                                                                                                                                                                                                                                                                                                                                                                         |
| <b>Scopus (Scopus)</b>                                                                      | <p><b>MAIN SEARCH:</b><br/> ((((TITLE("cost-effective*" OR "cost-utility" OR "cost-benefit" OR "economic evaluation") AND SUBJAREA(mult OR agri OR bioc OR immu OR neur OR phar OR mult OR medi OR nurs OR vete OR dent OR heal OR mult OR arts OR busi OR deci OR econ OR psyc OR soci) AND PUBYEAR &gt; 2011) OR (TITLE("cost per death" OR "cost per case" OR "cost per infection" OR "cost per life" OR "cost per disability-adjusted" OR "cost per quality-adjusted" OR "cost per qaly" OR "cost per daly") AND SUBJAREA(mult OR agri OR bioc OR immu OR neur OR phar OR mult OR medi OR nurs OR vete OR dent OR heal OR mult OR arts OR busi OR deci OR econ OR psyc OR soci) AND PUBYEAR &gt; 2011) OR (ABS("cost-effectiveness" OR "cost-utility" OR "cost-benefit" OR "economic evaluation") AND SUBJAREA(mult OR agri OR bioc OR immu OR neur OR phar OR mult OR medi OR nurs OR vete OR dent OR heal OR mult OR arts OR busi OR deci OR econ OR psyc OR soci) AND PUBYEAR &gt; 2011) OR (ABS("cost per death" OR "cost per case" OR "cost per infection" OR "cost per life" OR "cost per disability-adjusted" OR "cost per quality-adjusted" OR "cost per qaly" OR "cost per daly") AND SUBJAREA(mult OR agri OR bioc OR immu OR neur OR phar OR mult OR medi OR nurs OR vete OR dent OR heal OR mult OR arts OR busi OR deci OR econ OR psyc OR soci) AND PUBYEAR &gt; 2011) OR (AUTHKEY("cost-effectiveness" OR "cost-utility" OR "cost-benefit" OR "economic evaluation") AND SUBJAREA(mult OR agri OR bioc OR immu OR neur OR phar OR mult OR medi OR nurs OR vete OR dent OR heal OR mult OR arts OR busi OR deci OR econ OR psyc OR soci) AND PUBYEAR &gt; 2011)) AND (SUBJAREA(mult OR immu OR neur OR phar OR mult OR medi OR nurs OR dent OR heal OR deci OR econ OR psyc))) AND NOT (TITLE("study protocol")) AND NOT (DOCTYPE(bk OR ch OR bz OR cp OR cr OR ed OR er OR le OR no OR pr OR rp OR sh))</p> <p><b>BREAKING UP THE SEARCH:</b><br/> <b>BY YEAR: 2014 – 1,216</b></p> <p><b>BY YEAR: 2013 – 4,039</b><br/> <b>Broke this one up further – by “cost-effectiveness” in title, abstract, and keywords (3,148) and not (891)</b><br/> <b>BY YEAR: 2012 – 3,751</b></p> |
| <b>Social Science Citation Index &amp; Science Citation Index extended (Web of Science)</b> | <p># 1 4,006,203 PY=(2012 or 2013 or 2014)<br/> # 2 5,706 TI=("cost-effective*" or "cost-benefit" or "cost-utility" or "economic evaluation" or "cost per death" or "cost per case" or "cost per infection" or "cost per life" or "cost per disability-adjusted" or "cost per quality-adjusted" or "cost per qaly" or "cost per daly")<br/> # 3 13,274 TS=("cost-effectiveness" or "cost-benefit" or "cost-utility" or "economic evaluation" or "cost per death" or "cost per case" or "cost per infection" or "cost per life" or "cost per disability-adjusted" or "cost per quality-adjusted" or "cost per qaly" or "cost</p>                                                                                                                                                                                                                                                                                                                                                                                                                                                                                                                                                                                                                                                                                                                                                                                                                                                                                                                                                                                                                                                                                                                                                                                                                                                                                                                                                                                                                                                                                                                                                                     |

|                                       |                                                                                                                                                                                                                                                                                                                                                                                                                                                                                                                                                                                                                                                                                                                                                                                                                                                                                                                                                                                                                                                                                                                                                                                                                                                                                                                                                                                                                                                                                                                                                                                                                                                                                                                                                                                                                                                                                                                                                                                                                                                                                                                                                                                                                                                                                                                                                                                                                                                                                             |
|---------------------------------------|---------------------------------------------------------------------------------------------------------------------------------------------------------------------------------------------------------------------------------------------------------------------------------------------------------------------------------------------------------------------------------------------------------------------------------------------------------------------------------------------------------------------------------------------------------------------------------------------------------------------------------------------------------------------------------------------------------------------------------------------------------------------------------------------------------------------------------------------------------------------------------------------------------------------------------------------------------------------------------------------------------------------------------------------------------------------------------------------------------------------------------------------------------------------------------------------------------------------------------------------------------------------------------------------------------------------------------------------------------------------------------------------------------------------------------------------------------------------------------------------------------------------------------------------------------------------------------------------------------------------------------------------------------------------------------------------------------------------------------------------------------------------------------------------------------------------------------------------------------------------------------------------------------------------------------------------------------------------------------------------------------------------------------------------------------------------------------------------------------------------------------------------------------------------------------------------------------------------------------------------------------------------------------------------------------------------------------------------------------------------------------------------------------------------------------------------------------------------------------------------|
|                                       | <p>per daly")</p> <p># 4 1,091 TITLE: ("study protocol")</p> <p># 5 14,237 #3 OR #2</p> <p># 6 14,237 #5 AND #1</p> <p># 7 14,054 #6 not #4</p> <p># 8 2,900 (#7) AND DOCUMENT TYPES: (Abstract of Published Item OR Art Exhibit Review OR Bibliography OR Biographical-Item OR Book OR Book Chapter OR Book Review OR Chronology OR Correction OR Correction, Addition OR Dance Performance Review OR Database Review OR Discussion OR Editorial Material OR Excerpt OR Fiction, Creative Prose OR Film Review OR Hardware Review OR Item About an Individual OR Letter OR Meeting Abstract OR Meeting Summary OR Music Performance Review OR Music Score OR Music Score Review OR News Item OR Note OR Poetry OR Proceedings Paper OR Record Review OR Reprint OR Script OR Software Review OR TV Review, Radio Review OR TV Review, Radio Review, Video OR Theater Review)</p> <p># 9 11,154 #7 NOT #8</p> <p># 10 8,738 #9 AND WC=( PATHOLOGY OR BEHAVIORAL SCIENCES OR MEDICAL LABORATORY TECHNOLOGY OR BIOLOGY OR SOCIAL SCIENCES INTERDISCIPLINARY OR SOCIAL WORK OR HEALTH CARE SCIENCES SERVICES OR VIROLOGY OR MEDICINE GENERAL INTERNAL OR HEALTH POLICY SERVICES OR PUBLIC ENVIRONMENTAL OCCUPATIONAL HEALTH SCI OR PUBLIC ENVIRONMENTAL OCCUPATIONAL HEALTH OR MICROBIOLOGY OR PHARMACOLOGY PHARMACY OR RHEUMATOLOGY OR SOCIAL SCIENCES BM OR ECONOMICS OR NEUROSCIENCES OR PARASITOLOGY OR SURGERY OR ONCOLOGY OR REHABILITATION OR DENTISTRY ORAL SURGERY MEDICINE OR OPERATIONS RESEARCH MANAGEMENT SCIENCE OR FOOD SCIENCE TECHNOLOGY OR PUBLIC ENVIRONMENTAL OCCUPATIONAL HEALTH SSCI OR CARDIAC CARDIOVASCULAR SYSTEMS OR CRITICAL CARE MEDICINE OR INFECTIOUS DISEASES OR NURSING OR IMMUNOLOGY OR OPHTHALMOLOGY OR ANESTHESIOLOGY OR CLINICAL NEUROLOGY OR EMERGENCY MEDICINE OR MULTIDISCIPLINARY SCIENCES OR NUTRITION DIETETICS OR TOXICOLOGY OR MEDICINE RESEARCH EXPERIMENTAL OR SUBSTANCE ABUSE OR PSYCHIATRY OR DERMATOLOGY OR GASTROENTEROLOGY HEPATOLOGY OR GENETICS HEREDITY OR TRANSPLANTATION OR OBSTETRICS GYNECOLOGY OR TROPICAL MEDICINE OR MEDICAL INFORMATICS OR GERIATRICS GERONTOLOGY OR OTORHINOLARYNGOLOGY OR PERIPHERAL VASCULAR DISEASE OR ORTHOPEDICS OR MANAGEMENT OR PEDIATRICS OR UROLOGY NEPHROLOGY OR PSYCHIATRY SCI OR RESPIRATORY SYSTEM OR ENDOCRINOLOGY METABOLISM OR RADIOLOGY NUCLEAR MEDICINE MEDICAL IMAGING OR PRIMARY HEALTH CARE OR ENGINEERING ENVIRONMENTAL OR HEMATOLOGY) Indexes=SCI-EXPANDED, SSCI Timespan=2012-2014</p> |
| <p><b>Scielo (Web of Science)</b></p> | <p># 1 79,842 PY=(2012 or 2013 or 2014)</p> <p># 2 98 TI= ("cost-effective*" or "cost-benefit" or "cost-utility" or "economic evaluation" or "cost per death" or "cost per case" or "cost per infection" or "cost per life" or "cost per disability-adjusted" or "cost per quality-adjusted" or "cost per qaly" or "cost per daly")</p> <p># 3 221 TS=("cost-effectiveness" or "cost-benefit" or "cost-utility" or "economic evaluation" or "cost per death" or "cost per case" or "cost per infection" or "cost per life" or "cost per disability-adjusted" or "cost per quality-adjusted" or "cost per qaly" or "cost per daly")</p> <p># 4 227 #2 or #3</p> <p># 5 2 TI=("study protocol")</p> <p># 6 227 #4 not #5</p>                                                                                                                                                                                                                                                                                                                                                                                                                                                                                                                                                                                                                                                                                                                                                                                                                                                                                                                                                                                                                                                                                                                                                                                                                                                                                                                                                                                                                                                                                                                                                                                                                                                                                                                                                                  |

|                                |                                                                                                                                                                                                                                                                                                                                                                                                                                                                                                                                                                                                                                                                                                                                                                                                                                                                                                                                                                                                                                                                                                                                                                                                                                                                                                                                                                                                                                                                                                                                                                                                                                                                                                                                                                                                                                                                                                                                                                                                                                                                                                                                                                                                                                                                                          |
|--------------------------------|------------------------------------------------------------------------------------------------------------------------------------------------------------------------------------------------------------------------------------------------------------------------------------------------------------------------------------------------------------------------------------------------------------------------------------------------------------------------------------------------------------------------------------------------------------------------------------------------------------------------------------------------------------------------------------------------------------------------------------------------------------------------------------------------------------------------------------------------------------------------------------------------------------------------------------------------------------------------------------------------------------------------------------------------------------------------------------------------------------------------------------------------------------------------------------------------------------------------------------------------------------------------------------------------------------------------------------------------------------------------------------------------------------------------------------------------------------------------------------------------------------------------------------------------------------------------------------------------------------------------------------------------------------------------------------------------------------------------------------------------------------------------------------------------------------------------------------------------------------------------------------------------------------------------------------------------------------------------------------------------------------------------------------------------------------------------------------------------------------------------------------------------------------------------------------------------------------------------------------------------------------------------------------------|
|                                | <p># 7 175 #6 AND SU=( PUBLIC ENVIRONMENTAL OCCUPATIONAL HEALTH OR LEGAL MEDICINE OR GENERAL INTERNAL MEDICINE OR PEDIATRICS OR CARDIOVASCULAR SYSTEM CARDIOLOGY OR DENTISTRY ORAL SURGERY MEDICINE OR ANESTHESIOLOGY OR DERMATOLOGY OR PHARMACOLOGY PHARMACY OR ENDOCRINOLOGY METABOLISM OR GASTROENTEROLOGY HEPATOLOGY OR ENVIRONMENTAL SCIENCES ECOLOGY OR HEALTH CARE SCIENCES SERVICES OR NURSING OR MEDICAL LABORATORY TECHNOLOGY OR NEUROSCIENCES NEUROLOGY OR OPERATIONS RESEARCH MANAGEMENT SCIENCE OR OTORHINOLARYNGOLOGY OR OBSTETRICS GYNECOLOGY OR OPHTHALMOLOGY OR PSYCHIATRY OR PATHOLOGY OR RESPIRATORY SYSTEM OR RADIOLOGY NUCLEAR MEDICINE MEDICAL IMAGING OR TROPICAL MEDICINE OR SURGERY OR RHEUMATOLOGY OR UROLOGY NEPHROLOGY OR BIOTECHNOLOGY APPLIED MICROBIOLOGY OR INFECTIOUS DISEASES OR EConomics)</p> <p># 8 13 (#7) AND DOCUMENT TYPES: (Announcement OR Article-Commentary OR Case-Report OR Editorial OR Letter OR Rapid-Communication)</p> <p># 9 162 #7 not #8</p>                                                                                                                                                                                                                                                                                                                                                                                                                                                                                                                                                                                                                                                                                                                                                                                                                                                                                                                                                                                                                                                                                                                                                                                                                                                                                      |
| <b>Biosis (Web of Science)</b> | <p># 1 1,608,659 PY=(2012 or 2013 or 2014)</p> <p># 2 1,741 TI= ("cost-effective*" or "cost-benefit" or "cost-utility" or "economic evaluation" or "cost per death" or "cost per case" or "cost per infection" or "cost per life" or "cost per disability-adjusted" or "cost per quality-adjusted" or "cost per qaly" or "cost per daly")</p> <p># 3 3,846 TS=("cost-effectiveness" or "cost-benefit" or "cost-utility" or "economic evaluation" or "cost per death" or "cost per case" or "cost per infection" or "cost per life" or "cost per disability-adjusted" or "cost per quality-adjusted" or "cost per qaly" or "cost per daly")</p> <p># 4 4,109 #2 or #3</p> <p># 5 4,109 #1 and #4</p> <p># 6 35 TI= ("study protocol")</p> <p># 7 4,104 #5 not #6</p> <p># 8 777 (#7) AND DOCUMENT TYPES: (Annual Report OR Article Thesis Dissertation OR Book OR Book Chapter OR Book Review OR Company Profile OR Index OR Letter OR Main Cite OR Meeting OR Meeting Paper OR Obituary OR Patent OR Reprint OR Software OR Technical Report OR Thesis Dissertation)</p> <p># 9 3,327 #7 NOT #8</p> <p># 10 123 (#9) AND LITERATURE TYPE: (Annual Report OR Bibliography OR Biography OR Catalog OR Checklist OR Correction OR Dictionary OR Editorial OR Errata OR Identification Guide OR Manual OR Meeting Abstract OR Meeting Address OR Meeting Paper OR Meeting Poster OR Meeting Report OR Meeting Slide OR Meeting Summary OR Nomenclator OR Nomenclature OR Obituary OR Protocol OR Retraction OR Software Review OR Standard OR Taxonomic Key OR Taxonomic Review)</p> <p># 11 3,204 #9 not #10</p> <p># 12 2,643 #11 AND SU=( TOXICOLOGY OR RADIOLOGY NUCLEAR MEDICINE MEDICAL IMAGING OR REPRODUCTIVE BIOLOGY OR HEMATOLOGY OR ANESTHESIOLOGY OR DEVELOPMENTAL BIOLOGY OR INFECTIOUS DISEASES OR ORTHOPEDICS OR PUBLIC ENVIRONMENTAL OCCUPATIONAL HEALTH OR BEHAVIORAL SCIENCES OR EVOLUTIONARY BIOLOGY OR IMMUNOLOGY OR REHABILITATION OR ONCOLOGY OR NURSING OR PHYSIOLOGY OR CARDIOVASCULAR SYSTEM CARDIOLOGY OR NUTRITION DIETETICS OR DENTISTRY ORAL SURGERY MEDICINE OR NEUROSCIENCES NEUROLOGY OR ALLERGY OR SURGERY OR OPHTHALMOLOGY OR GENETICS HEREDITY OR OBSTETRICS GYNECOLOGY OR GASTROENTEROLOGY HEPATOLOGY OR DERMATOLOGY OR GENERAL INTERNAL MEDICINE OR</p> |

|                       |                                                                                                                                                                                                                                                                                                                                                                                                                                                                                                                                                                                                                                                                                                                                                                                                                                                                                                                                                                                                                                                                                                                                                                                                                                                                                                                                                                                                                                                                                                        |
|-----------------------|--------------------------------------------------------------------------------------------------------------------------------------------------------------------------------------------------------------------------------------------------------------------------------------------------------------------------------------------------------------------------------------------------------------------------------------------------------------------------------------------------------------------------------------------------------------------------------------------------------------------------------------------------------------------------------------------------------------------------------------------------------------------------------------------------------------------------------------------------------------------------------------------------------------------------------------------------------------------------------------------------------------------------------------------------------------------------------------------------------------------------------------------------------------------------------------------------------------------------------------------------------------------------------------------------------------------------------------------------------------------------------------------------------------------------------------------------------------------------------------------------------|
|                       | PARASITOLOGY OR HEALTH CARE SCIENCES SERVICES OR PSYCHIATRY OR PEDIATRICS OR GERIATRICS<br>GERONTOLOGY OR ENDOCRINOLOGY METABOLISM OR RHEUMATOLOGY OR UROLOGY NEPHROLOGY OR<br>RESPIRATORY SYSTEM OR OTORHINOLARYNGOLOGY )                                                                                                                                                                                                                                                                                                                                                                                                                                                                                                                                                                                                                                                                                                                                                                                                                                                                                                                                                                                                                                                                                                                                                                                                                                                                             |
| <b>Cinahl (EBSCO)</b> | <p>S1. TI ("cost-effective*" or "cost-benefit" or "cost-utility" or "economic evaluation" or "cost per death" or "cost per case" or "cost per infection" or "cost per life" or "cost per disability-adjusted" or "cost per quality-adjusted" or "cost per qaly" or "cost per daly")</p> <p>S2. AB ("cost-effectiveness" or "cost-benefit" or "cost-utility" or "economic evaluation" or "cost per death" or "cost per case" or "cost per infection" or "cost per life" or "cost per disability-adjusted" or "cost per quality-adjusted" or "cost per qaly" or "cost per daly")</p> <p>S3. S1 OR S2</p> <p>S4. TI ("study protocol")</p> <p>S5. S3 NOT S4</p> <p>S6. S5 and PT (Algorithm OR Anecdote OR Bibliography OR Biography OR Book OR Book Chapter OR Book Review OR Brief Item OR Care Plan OR Cartoon OR Case Study OR CEU OR Classification Term OR Code of Ethics OR Commentary OR Computer Program OR Consumer/Patient Teaching Materials OR Critical Path OR Directories OR Doctoral Dissertation OR Editorial OR Evidence-Based Care Sheet OR Exam Questions OR Forms OR Games OR Glossary OR Historical Material OR Interview OR Legal Case OR Letter OR Masters Thesis OR Nurse Practice Acts OR Obituary OR Pamphlet OR Pamphlet Chapter OR Periodical OR Poetry OR Practice Acts OR Proceedings OR Quick Lesson OR Research Instrument Validation OR Response OR Standards OR Statistics OR Teaching Materials OR Tracings OR Trade Publication OR Website)</p> <p>S7. S5 NOT S6</p> |

**Table S2 Mapping of 25 disease areas onto the Global Burden of Disease (GBD), International Classification of Disease (ICD-10), and search terms used**

Health areas developed for this analysis are listed in alphabetical order in the lefthand column. We mapped each component of the Global Burden of Disease (World Health Organization., 2014) onto one health area. The mapping of the ICD-10 codes (World Health Organization., 2011) onto GBD codes is taken from the GBD appendices. Both GBD and ICD-10 definitions were used to inform the development of search terms for each health areas, which were applied as necessary to the titles, abstracts, and/or keywords in the final database of economic evaluations. Underscores (“\_”) have been used here to show single spaces and question marks (“?”) reflect a single wildcard character. GBD: Global Burden of Disease. ICD-10: International Classification of Disease, version 10.

| Health area                            | GBD                                          | ICD-10                      | Search terms used to identify economic evaluations in this area                                                                                                                                                                                                                                                                                                                                                                        |
|----------------------------------------|----------------------------------------------|-----------------------------|----------------------------------------------------------------------------------------------------------------------------------------------------------------------------------------------------------------------------------------------------------------------------------------------------------------------------------------------------------------------------------------------------------------------------------------|
| <b>Anaemia</b>                         | 58: Iron-deficiency anaemia                  | D50, D64.9                  | Anaemia, Anemia, Anemic, Anaemic, Iron?deficien, _iron_, iron?supplement,                                                                                                                                                                                                                                                                                                                                                              |
| <b>Cancer and other neoplasms</b>      | 61: Malignant neoplasms, 79: Other neoplasms | C00-C97, D00-D48            | Adenocarcinoma, Adenoma, Cancer, carcinoma, chemoradiotherapy, Chemotherapy, Glioblastoma, glioma, Neoplasm, Radiation_therapy, Radiotherapy, Melanoma, Lymphoma, myeloma, neoplastic, Leukaemia, microcalcification, neoplasia, myelodysplas, leukemia, metastatic, sarcoma, paclitaxel, Hematopoietic_Stem_Cell, autologous_stem_cell, cervical_screen, pap_smear, lynch_syndrome, tumour, tumor, breast_reconstruction, metastasis, |
| <b>Cardiovascular diseases</b>         | 110: Cardiovascular diseases                 | I00-I99                     | Angina, Angioplasty, Anticoagulants, aorta, aortic, Arrhythmia, Arrhythmic, arterial, artery, Atrial_Fibrillation, blood_pressure, blood_vessel, cardiac, cardio, carotid, Chest, cholesterol, Coronary, Deep_Vein_Thrombosis, embolism, heart, hypertensi, myocarditis, endocarditis, Myocardial, pulmonary, stroke, aneurysm, circulatory, warfarin, rheumatic, varicose_vein, venous*ulcer, vascular_disease,                       |
| <b>Communicable childhood diseases</b> | 12: Childhood-cluster diseases               | A33-A37, B05                | chickenpox, Pertussis, Whooping_cough, Diphtheria, Measles, Tetanus, chicken_pox, rubella, immunization,                                                                                                                                                                                                                                                                                                                               |
| <b>Congenital anomalies</b>            | 140: Congenital anomalies                    | Q00-Q99                     | chromosom, cleft_lip, Dwarfism, cystic_fibrosis, Neural_tube_defect, Cleft_lip, Congenital, cleft_palate, Down_Syndrome, Down's_Syndrome, Down's_Syndrome, disabilities, disabled_children, neural_tube, congenital, Tetralogy_of_Fallot, spina_bifida, trisomy, polydactyl, teratogenic,                                                                                                                                              |
| <b>Diabetes</b>                        | 80: Diabetes mellitus                        | E10-E14                     | Diabetes, glucose, diabetic, hyperglycemi,                                                                                                                                                                                                                                                                                                                                                                                             |
| <b>Diarrhoeal diseases</b>             | 11: Diarrhoeal diseases                      | A00, A01, A03, A04, A06-A09 | diarrhea, diarrhoea, rotavirus, cholera, typhoid, shigell, amoebiasis, amoeba, rotaviral, enteritis, norwalk, adenovir, escherichia_coli, campylobacter, clostridium_difficile, dysentery, giardia, cryptosporid, norovirus,                                                                                                                                                                                                           |
| <b>Digestive diseases</b>              | 121: Digestive diseases                      | K20-K92                     | celiac, cholera, coeliac, crohn, Digestive, gallbladder, gallstones, gall?stones, gastric, gastro, helicobacter, ileostomy, colitis, constipation, Appendectomy, appendicitis, hernia_, bowel_, Intestinal_Polyps, Peptic_ulcer, diverticulitis, Cholecystolithiasis, pancreatitis, Cholecystitis, liver_, biliary, duodenal, vomit, ileus, hepatic, inguinal_hernia,                                                                  |

| Health area                                                                                                       | GBD                                                                        | ICD-10                                                    | Search terms used to identify economic evaluations in this area                                                                                                                                                                                                                                                                                                                                                                                                                                                                                                                                                                                                                                                                                                      |
|-------------------------------------------------------------------------------------------------------------------|----------------------------------------------------------------------------|-----------------------------------------------------------|----------------------------------------------------------------------------------------------------------------------------------------------------------------------------------------------------------------------------------------------------------------------------------------------------------------------------------------------------------------------------------------------------------------------------------------------------------------------------------------------------------------------------------------------------------------------------------------------------------------------------------------------------------------------------------------------------------------------------------------------------------------------|
| <b>Endocrine, blood, and immune disorders (not diabetes or HIV)</b>                                               | 81: Endocrine, blood, immune disorders                                     | D55-D64 (minus D64.9), D65-D89, E03-E07, E15-E34, E65-E88 | graves_disease, Hormones, hyperthyroidism, hypothyroidism, Goiter, Endocrin, Haemophilia, Adrenal, Allerg, Anaphylaxis, hemophilia, thyroid, hematological, neutropenia, Ischaemi, Ischemi, tonsil, thalassaemia, thalassemia, Thrombocytopenia, Fabry_disease, lysosomal, sickle_cell,                                                                                                                                                                                                                                                                                                                                                                                                                                                                              |
| <b>Genitourinary diseases, family planning &amp; fertility</b>                                                    | 126: Genitourinary diseases                                                | N00-N64, N75-N76, N80-N98                                 | Gynecolog, Gynaecolog, contraception, contraceptive, embryo, fertility, fertilization, prostat, urologic, urinary, urethral_, genito, Kidney, Urolithiasis, nephrolog, Infertility, infertile, Nephrostomy, dialysis, pyelography, ovulation, urodynamic, ureter, hypogonadism, menstrual, nephropathy, microalbuminur, nephritis, bladder, varicocele,                                                                                                                                                                                                                                                                                                                                                                                                              |
| <b>HIV/AIDS</b>                                                                                                   | 10: HIV/AIDS                                                               | B20-B24                                                   | Acquired_Immune_Deficiency_Syndrome, CD4, HAART, retroviral, hiv?aids, _hiv_, Human_Immunodeficiency_Virus, cd4_,                                                                                                                                                                                                                                                                                                                                                                                                                                                                                                                                                                                                                                                    |
| <b>Malaria</b>                                                                                                    | 22: Malaria                                                                | B50-B54, P37.3, P37.4                                     | bed?net, malaria, bednet, artemesenin,                                                                                                                                                                                                                                                                                                                                                                                                                                                                                                                                                                                                                                                                                                                               |
| <b>Malnutrition (including obesity and exercise)</b>                                                              | 54: Nutritional deficiencies ( <i>except 58: Iron-deficiency anaemia</i> ) | E00-E02, E40-E46, E50-E64, D51-D53                        | bariatric, Body_Mass_Index, Body_Weight, nutrition, Iodine, Vitamin_A, obesity, obese, physical_activity, exercise, pedometer, vegetable, dietary, biofortif, weight_management,                                                                                                                                                                                                                                                                                                                                                                                                                                                                                                                                                                                     |
| <b>Maternal and neonatal conditions</b>                                                                           | 42: Maternal conditions, 49: Neonatal conditions                           | O00-O99, P00-P96 excl P37.3, P37.4                        | low?birth?weight, Preterm, Birth, Neonat, Newborn, New-born, Amniocentesis, Birth, caesarean, cesarean, fetal, folic_acid, gestational, preeclampsia, eclampsia, pregnancy, prenatal, abortion, endometrial, obstetric, premature_infant, prematurity, vaginal_deliver,                                                                                                                                                                                                                                                                                                                                                                                                                                                                                              |
| <b>Meningitis</b>                                                                                                 | 17: Meningitis                                                             | A39, G00, G03                                             | mening,                                                                                                                                                                                                                                                                                                                                                                                                                                                                                                                                                                                                                                                                                                                                                              |
| <b>Mental health, cognition, and developmental and behavioural disorders (including self-harm and addictions)</b> | 82: Mental and behavioural disorders, 161: Self-harm                       | F04-F99, X41-X42, X45, X60-X84, Y870                      | ADHD, Agoraphobi, Antidepressant, Antidepressive, Anxiety, autism, Autistic, Schizophreni, Bipolar, _cognition, cognitive, Dementia, depression, substance_use_disorder, opiate_substitution, Eating_Disorder, _Emotions, mental_health, heroin, psychosis, psychotic, Unipolar, cocaine, addiction, Alcohol_use, Drug_use, developmental_disorder, behavioural_disorder, intellectual, behavio?r_disorder, clinically_isolated_syndrome, mentally_ill, Somatoform, depressive_disorder, Alcohol, Drug_Abuse, Drug_Addiction, Narcotic_Control, smoking, substance_abuse, Psychotherapy, mental_illness, Mental_Disorder, suicide, smoker, methadone, methadone, delirium, Nicotine, attention?deficit?hyperactivity?disorder, fear_of, behavior_disorder, cannabis, |
| <b>Musculoskeletal diseases (including back and neck pain)</b>                                                    | 134: Musculoskeletal diseases                                              | M00-M99                                                   | ankle, Bone, Carpal_Tunnel, Cartilage, elbow, fracture, Joint, knee, Ligament, arthritis, Lumbar, Discectomy, discectomy, musculoskeletal, Physical_Therapy_, osteoporo, fibromyalgia, Spinal, foot, shoulder, orthopedic, hip_replacement, lupus, Gout, low?back_pain,                                                                                                                                                                                                                                                                                                                                                                                                                                                                                              |
| <b>Neurological</b>                                                                                               | 94: Neurological                                                           | F01-F03, G06 -G98                                         | cerebral, nervous_system, neurological, Epilepsy, Alzheimer, Parkinson,                                                                                                                                                                                                                                                                                                                                                                                                                                                                                                                                                                                                                                                                                              |

| Health area                                                                                                                                    | GBD                                                                                                                                                                                                       | ICD-10                                                                                                                                                                                                                                                                                                                                 | Search terms used to identify economic evaluations in this area                                                                                                                                                                                                                                                                                                                                                                                                                                                              |
|------------------------------------------------------------------------------------------------------------------------------------------------|-----------------------------------------------------------------------------------------------------------------------------------------------------------------------------------------------------------|----------------------------------------------------------------------------------------------------------------------------------------------------------------------------------------------------------------------------------------------------------------------------------------------------------------------------------------|------------------------------------------------------------------------------------------------------------------------------------------------------------------------------------------------------------------------------------------------------------------------------------------------------------------------------------------------------------------------------------------------------------------------------------------------------------------------------------------------------------------------------|
| <b>conditions (including headache and sleep disorders)</b>                                                                                     | conditions                                                                                                                                                                                                |                                                                                                                                                                                                                                                                                                                                        | Epileptic, Multiple_sclerosis, Migraine, headache, sleep, Myasthenia_gravis, thymectomy, neurosurgery, neuropath, chronic_fatigue_syndrome, neuralgia,                                                                                                                                                                                                                                                                                                                                                                       |
| <b>Other infectious diseases (including encephalitis, hep A, B, C, and other parasitic and vector-borne diseases, and nematode infections)</b> | 18: Encephalitis, 19: Acute hepatitis B, 20: Acute hepatitis C, 21: Parasitic and vector diseases ( <i>except</i> 22: <i>Malaria</i> ), 33: Intestinal nematode infections, 37: Other infectious diseases | A83-A86, B94.1, G04, B16-B19 (minus B17.1, B18.2), B17.1, B18.2, A30, A71, A82, A90-A91, B55-B57, B65, B73, B74.0-B74.2, B76-B77, B79, A02, A05, A20-A28, A31, A32, A38, A40-A49, A65-A70, A74-A79, A80-A81, A87-A89, A92-A99, B00-B04, B06-B15, B25-B49, B58-B60, B64, B66-B72, B74.3-B74.9, B75, B78, B80-B89, B91-B99 (minus B94.1) | Encephaliti, Dengue, lyme_, deworming, hepatitis, hep_b, hep_c, Trypanosomiasis, Chagas, Schistosom, Leishmania, Lymphatic_filariasis, Onchocerciasis, Leprosy, leprous, Trachoma, Rabies, Ascariasis, Trichuriasis, Hookworm, hep_a, rubella, herpes_zoster, clostridium, Staphylococc, Bacteremia, hospital-acquired_infection, septic_shock, sepsis, Staphylococc, scabies, systemic_Candida_infection, cytomegalovirus, infection_control, hcv, Creutzfeldt?Jakob, _invasive_Candid, Helminth, roundworm, antimicrobial, |
| <b>Respiratory diseases</b>                                                                                                                    | 38: Respiratory infections, 117: Respiratory diseases                                                                                                                                                     | J00-J22, H65-H68, P23, U04, J30-J98                                                                                                                                                                                                                                                                                                    | Respiratory, Pulmonary, Lung, Bronchial, Trachea, Bronchitis, Airway, Asthma, H1N1, Influenza, bird_flu, avian_flu, interstit, Pleural_effusion, sore_throat, pneumonia, Respiration, pneumococcal, Haemophilus, breathing, pharyngitis, pneumonia,                                                                                                                                                                                                                                                                          |
| <b>Sense organ diseases</b>                                                                                                                    | 102: Sense organ diseases                                                                                                                                                                                 | H00-H61, H69-H93                                                                                                                                                                                                                                                                                                                       | Blindness, Cataract, cochlear, deafness, eye_, Glaucoma, hearing, Macular, rhino, Nasolacrimal, Refractive_error, vision_loss, hearing_loss, canaloplasty, Trabeculectomy, retina, Ophthalmolog, keratoplasty, otitis_media,                                                                                                                                                                                                                                                                                                 |
| <b>Skin and oral conditions</b>                                                                                                                | 133: Skin diseases, 147: Oral conditions                                                                                                                                                                  | L00-L98, K00-K14                                                                                                                                                                                                                                                                                                                       | debridement, Dental, Dentistry, Denture, gingival, Edentulism, Periodontal, peritonsillar, Dentition, Orthodontics, Dermatitis, Dermatolog, Eczema, skin_disease, tinea, psoriasis, dermatophytic, plantar_wart, skin?graft, soft_tissue, foam_dressing, pressure_ulcer,                                                                                                                                                                                                                                                     |
| <b>Sexually Transmitted Infections (not HIV)</b>                                                                                               | 4: STDs excluding HIV                                                                                                                                                                                     | A50-A64, N70-N73                                                                                                                                                                                                                                                                                                                       | chlamydia, condoms, Gonorrhoea, Papillomavirus, Syphilis, Gonorrhoea, Trichomoniasis, Sexually_Transmitted, hpv,                                                                                                                                                                                                                                                                                                                                                                                                             |
| <b>Tuberculosis</b>                                                                                                                            | 3: Tuberculosis                                                                                                                                                                                           | A15-A19, B90                                                                                                                                                                                                                                                                                                                           | antitubercular, BCG, TB, tuberculos, bacille_Calmette-Guerin,                                                                                                                                                                                                                                                                                                                                                                                                                                                                |
| <b>Wounds and injuries</b>                                                                                                                     | 151: Injuries ( <i>except</i> 161: <i>Self-harm</i> )                                                                                                                                                     | V01-X59, Y871-Y89,                                                                                                                                                                                                                                                                                                                     | Injury, Injuries, Accident, Burn, violence, Poisoning, Drown, child_abuse, domestic_abuse, Domestic_Violence, trauma, fall_prevention, falls_prevention, venom, antidote, whiplash, _radon_, road_safety,                                                                                                                                                                                                                                                                                                                    |



**Table S3 Classification of journal types**

The following is a comprehensive list of how we classified journals publishing at least one economic evaluation meeting our criteria.

| <b>Health economics, policy, services, and/or social science journals</b>      |                                                               |
|--------------------------------------------------------------------------------|---------------------------------------------------------------|
| Administration and Policy in Mental Health and Mental Health Services Research | International Journal of Technology Assessment in Health Care |
| AIDS and behavior                                                              | Israel Journal of Health Policy Research                      |
| Alter                                                                          | Journal d'Economie Medicale                                   |
| American Health and Drug Benefits                                              | Journal of Benefit-Cost Analysis                              |
| Applied Health Economics and Health Policy                                     | Journal of health economics                                   |
| Behaviour research and therapy                                                 | JOURNAL OF HEALTH SERVICES RESEARCH and POLICY                |
| BMC HEALTH SERVICES RESEARCH                                                   | Journal of Medical Economics                                  |
| BMC Medical Informatics and Decision Making                                    | Journal of Mental Health Policy and Economics                 |
| British Journal of Health Care Management                                      | Journal of Nursing Management                                 |
| Bulletin of the World Health Organization                                      | JOURNAL OF NUTRITION EDUCATION AND BEHAVIOR                   |
| Cancer Management and Research                                                 | Journal of Pain and Symptom Management                        |
| CHILDREN AND YOUTH SERVICES REVIEW                                             | Journal of Pharmaceutical Health Services Research            |
| ClinicoEconomics and Outcomes Research                                         | Journal of Public Health Management and Practice              |
| Cost Effectiveness and Resource Allocation                                     | Medical Decision Making                                       |
| Decision Sciences                                                              | Mediterranean Journal of Social Sciences                      |
| Epilepsy and Behavior                                                          | Ontario Health Technology Assessment Series                   |
| European Journal of Health Economics                                           | Open Pharmacoeconomics and Health Economics Journal           |
| European Review of Agricultural Economics                                      | Pharmacoeconomics                                             |
| Expert review of pharmacoeconomics and outcomes research                       | Pharmacoeconomics - Italian Research Articles                 |
| Gesundheitsökonomie und Qualitätsmanagement                                    | Pharmacoeconomics - Spanish Research Articles                 |
| GMS health technology assessment                                               | Population Health Management                                  |
| Health Affairs                                                                 | Psychological Services                                        |
| Health Economics                                                               | Research in Social and Administrative Pharmacy                |
| Health Economics Review                                                        | Revista medica del Instituto Mexicano del Seguro Social       |
| Health Policy                                                                  | Social Psychiatry and Psychiatric Epidemiology                |
| Health Policy and Planning                                                     | South African Journal of Economic and Management Sciences     |
| Health Policy and Technology                                                   | Substance abuse treatment, prevention, and policy             |
| Health Services Research                                                       | Therapeutics and Clinical Risk Management                     |
| Health Technology Assessment                                                   | Value in Health                                               |
| Healthcare Policy                                                              | Value in Health Regional Issues                               |
| International Journal of Behavioral Nutrition and Physical Activity            | Vascular Health and Risk Management                           |
| International Journal of Drug Policy                                           |                                                               |
| <b>Other</b>                                                                   |                                                               |
| American Water Works Association Journal                                       | Journal of Water and Health                                   |
| Child Abuse and Neglect                                                        | MATHEMATICAL MODELLING OF NATURAL PHENOMENA                   |
| Disasters                                                                      | PLoS One                                                      |
| Environment International                                                      | Traffic Injury Prevention                                     |
| European Journal of Operational Research                                       |                                                               |
| Journal of interpersonal violence                                              |                                                               |
| <b>Biomedical journals</b>                                                     |                                                               |
| [Rinsho ketsueki] The Japanese journal of clinical hematology                  | Iowa Orthopaedic Journal                                      |
| Academic Emergency Medicine                                                    | Iranian journal of neurology                                  |
| Academic Pediatrics                                                            | Iranian Journal of Pediatrics                                 |
| Acta Chirurgiae Orthopaedicae et Traumatologiae Cechoslovaca                   | Iranian Journal of Pharmaceutical Research                    |
| Acta Chirurgica Belgica                                                        | Iranian Journal of Radiology                                  |
|                                                                                | Iranian Red Crescent Medical Journal                          |
|                                                                                | Irish Journal of Medical Science                              |

|                                                          |                                                        |
|----------------------------------------------------------|--------------------------------------------------------|
| Acta clinica Belgica                                     | ISRN Gastroenterology                                  |
| Acta gastroenterologica Latinoamericana                  | ISRN Obstetrics and Gynecology                         |
| Acta Medica Indonesiana                                  | Italian Journal of Public Health                       |
| Acta neurochirurgica                                     | JACC: Heart Failure                                    |
| Acta Neurologica Scandinavica                            | JAMA                                                   |
| Acta Neuropsychiatrica                                   | JAMA Ophthalmology                                     |
| Acta Obstetricia et Gynecologica Scandinavica            | JAMA Pediatrics                                        |
| Acta Oncologica                                          | Japanese Journal of Ophthalmology                      |
| Acta Ophthalmologica                                     | Japanese Pharmacology and Therapeutics                 |
| Acta Oto-Laryngologica                                   | Joint Commission Journal on Quality and Patient Safety |
| Acta Psychiatrica Scandinavica                           | Joint, Bone, Spine                                     |
| Acta Radiologica                                         | Jornal Portugues de Gastreenterologia                  |
| Actas dermo-sifiliograficas                              | Journal de Mycologie Medicale                          |
| Actas Urologicas Espanolas                               | Journal for Healthcare Quality                         |
| Acupuncture in Medicine                                  | Journal of Acquired Immune Deficiency Syndromes        |
| Addiction                                                | Journal of Adolescent Health                           |
| Advances in Clinical and Experimental Medicine           | Journal of Advanced Nursing                            |
| Advances in Skin and Wound Care                          | Journal of affective disorders                         |
| Advances in Therapy                                      | Journal of Aging Research                              |
| Aesthetic Surgery Journal                                | Journal of Allergy and Clinical Immunology             |
| African health sciences                                  | Journal of Alternative and Complementary Medicine      |
| African Journal of AIDS Research                         | Journal of Antivirals and Antiretrovirals              |
| African Journal of Urology                               | Journal of Anxiety Disorders                           |
| Age and Ageing                                           | Journal of Arthroplasty                                |
| AIDS                                                     | Journal of Arthropod-Borne Diseases                    |
| AIDS Care                                                | Journal of Asthma                                      |
| Alcohol and Alcoholism                                   | Journal of bone and joint surgery                      |
| Alcoholism Clinical and Experimental Research            | Journal of Bone and Mineral Research                   |
| Alimentary Pharmacology and Therapeutics                 | Journal of Brain Science                               |
| Allergologie                                             | Journal of Bronchology and Interventional Pulmonology  |
| Alzheimer's and Dementia                                 | Journal of Burn Care and Research                      |
| American heart journal                                   | Journal of Cancer                                      |
| American Journal of Cardiology                           | Journal of Cancer Epidemiology                         |
| American Journal of Cardiovascular Drugs                 | Journal of Cardiothoracic Surgery                      |
| American Journal of Clinical Dermatology                 | Journal of Cardiovascular Computed Tomography          |
| American Journal of Clinical Oncology                    | Journal of Cardiovascular Electrophysiology            |
| American Journal of Emergency Medicine                   | Journal of Cardiovascular Magnetic Resonance           |
| American Journal of Gastroenterology                     | Journal of Cardiovascular Medicine                     |
| American Journal of Geriatric Psychiatry                 | Journal of Cardiovascular Nursing                      |
| American Journal of Health-System Pharmacy               | Journal of Cataract and Refractive Surgery             |
| AMERICAN JOURNAL OF HYPERTENSION                         | Journal of Child and Adolescent Substance Abuse        |
| American Journal of Industrial Medicine                  | Journal of Child and Family Studies                    |
| American Journal of Infection Control                    | Journal of Children's Orthopaedics                     |
| American Journal of Kidney Diseases                      | Journal of Clinical Apheresis                          |
| American Journal of Managed Care                         | Journal of Clinical Endocrinology and Metabolism       |
| American Journal of Medical Genetics Part A              | Journal of clinical gastroenterology                   |
| American Journal of Medicine                             | Journal of Clinical Hypertension                       |
| American Journal of Neuroradiology                       | Journal of clinical lipidology                         |
| American Journal of Obstetrics and Gynecology            | JOURNAL OF CLINICAL MICROBIOLOGY                       |
| American journal of ophthalmology                        | Journal of clinical nursing                            |
| American Journal of Perinatology                         | Journal of Clinical Oncology                           |
| American Journal of Pharmacy Benefits                    | Journal of Clinical Periodontology                     |
| American Journal of Physical Medicine and Rehabilitation | Journal of Clinical Psychiatry                         |
| American Journal of Preventive Medicine                  | Journal of Clinical Sleep Medicine                     |
| American Journal of Public Health                        | Journal of Clinical Ultrasound                         |
| American Journal of Rhinology and Allergy                | Journal of Clinical Virology                           |

|                                                                  |                                                                                 |
|------------------------------------------------------------------|---------------------------------------------------------------------------------|
| American Journal of Roentgenology                                | Journal of Cognitive and Behavioral Psychotherapies                             |
| American Journal of Speech-Language Pathology                    | Journal of community health                                                     |
| American journal of sports medicine                              | Journal of Comparative Effectiveness Research                                   |
| American Journal of Surgery                                      | JOURNAL OF CROHNS and COLITIS                                                   |
| AMERICAN JOURNAL OF THERAPEUTICS                                 | Journal of Crohn's and Colitis                                                  |
| American Journal of Transplantation                              | Journal of Cystic Fibrosis                                                      |
| American Journal of Tropical Medicine and Hygiene                | Journal of Dental Research                                                      |
| Anesthesiology                                                   | Journal of Dermatological Treatment                                             |
| Angiology                                                        | Journal of Endourology                                                          |
| Annali di igiene : medicina preventiva e di comunita             | Journal of Endovascular Therapy                                                 |
| Annals of Allergy, Asthma and Immunology                         | JOURNAL OF EPIDEMIOLOGY AND COMMUNITY HEALTH                                    |
| Annals of cardiothoracic surgery                                 | Journal of evaluation in clinical practice                                      |
| Annals of Emergency Medicine                                     | Journal of Food and Drug Analysis                                               |
| Annals of General Psychiatry                                     | Journal of Food Protection                                                      |
| Annals of Hematology                                             | JOURNAL OF FOOT AND ANKLE RESEARCH                                              |
| Annals of Internal Medicine                                      | JOURNAL OF GASTROENTEROLOGY AND HEPATOLOGY                                      |
| Annals of Nuclear Medicine                                       | Journal of Gastrointestinal Cancer                                              |
| Annals of Oncology                                               | Journal of Gastrointestinal Surgery                                             |
| Annals of Pharmacotherapy                                        | Journal of General Internal Medicine                                            |
| Annals of Plastic Surgery                                        | Journal of Global Health                                                        |
| Annals of rehabilitation medicine                                | Journal of gynecologic oncology                                                 |
| Annals of Surgery                                                | Journal of hand surgery                                                         |
| Annals of Surgical Oncology                                      | journal of headache and pain                                                    |
| Annals of the Rheumatic Diseases                                 | Journal of Hearing Science                                                      |
| Annals of the Royal College of Surgeons of England               | Journal of Heart and Lung Transplantation                                       |
| Annals of Thoracic Surgery                                       | JOURNAL OF HEPATOLOGY                                                           |
| Annals of Vascular Surgery                                       | Journal of Hospital Infection                                                   |
| Antimicrobial Agents and Chemotherapy                            | Journal of Hospital Medicine                                                    |
| Antiviral therapy                                                | Journal of Hypertension                                                         |
| ANZ Journal of Surgery                                           | Journal of Infection                                                            |
| Archives of Disease in Childhood                                 | Journal of Infectious Diseases                                                  |
| Archives of Gynecology and Obstetrics                            | Journal of Interventional Cardiology                                            |
| Archives of Internal Medicine                                    | Journal of Korean Academy of Nursing Administration                             |
| Archives of Iranian Medicine                                     | Journal of Korean Medical Science                                               |
| Archives of Medical Research                                     | Journal of long-term effects of medical implants                                |
| Archives of Medical Science                                      | Journal of Lower Genital Tract Disease                                          |
| Archives of Ophthalmology                                        | Journal of Managed Care Medicine                                                |
| Archives of Pathology and Laboratory Medicine                    | Journal of Managed Care Pharmacy                                                |
| Archives of Pediatrics and Adolescent Medicine                   | journal of maternal-fetal and neonatal medicine                                 |
| Archives of Surgery                                              | Journal of Medical Colleges of PLA                                              |
| ARCHIVOS DE BRONCONEUMOLOGIA                                     | Journal of Medical Internet Research                                            |
| Archivos de Neurociencias                                        | Journal of Mental Health                                                        |
| Arquivos brasileiros de cardiologia                              | Journal of microbiology, immunology, and infection = Wei mian yu gan ran za zhi |
| Arquivos Brasileiros de Oftalmologia                             | Journal of Nervous and Mental Disease                                           |
| Arquivos de Gastroenterologia                                    | Journal of Neurology                                                            |
| Arthritis Care and Research                                      | Journal of Neurology Neurosurgery and Psychiatry                                |
| Arthroscopy                                                      | Journal of Neuro-Ophthalmology                                                  |
| ARYA Atherosclerosis                                             | Journal of neurosurgery                                                         |
| Asian Biomedicine                                                | Journal of neurosurgery. Spine                                                  |
| Asian Pacific Journal of Cancer Prevention                       | Journal of Neurosurgery: Spine                                                  |
| Asian Pacific Journal of Tropical Disease                        | JOURNAL OF NEUROSURGERY-SPINE                                                   |
| Asia-Pacific Journal of Clinical Oncology                        | Journal of Nuclear Medicine                                                     |
| Asia-Pacific Journal of Public Health                            | Journal of Nursing Scholarship                                                  |
| Atencion Farmaceutica                                            | Journal of Nutrition                                                            |
| Atencion Primaria                                                | JOURNAL OF OBSTETRICS AND GYNAECOLOGY                                           |
| Australian and New Zealand Journal of Obstetrics and Gynaecology |                                                                                 |

|                                                                 |                                                                       |
|-----------------------------------------------------------------|-----------------------------------------------------------------------|
| Australian and New Zealand journal of public health             | Journal of Obstetrics and Gynaecology Canada                          |
| Australian Health Review                                        | Journal of Occupational and Environmental Medicine                    |
| Australian Journal of Primary Health                            | Journal of Occupational Rehabilitation                                |
| Autism                                                          | Journal of Oncology Pharmacy Practice                                 |
| Biochemia medica                                                | Journal of Oncology Practice                                          |
| BioDrugs                                                        | Journal of Orthopaedic Research                                       |
| Biologics in Therapy                                            | Journal of orthopaedic trauma                                         |
| Biology of Blood and Marrow Transplantation                     | Journal of Otolaryngology - Head and Neck Surgery                     |
| BioMed research international                                   | Journal of Pain and Palliative Care Pharmacotherapy                   |
| Biomedica                                                       | Journal of pediatric ophthalmology and strabismus                     |
| BIOMEDICAL ENGINEERING-BIOMEDIZINISCHE<br>TECHNIK               | Journal of Pediatrics                                                 |
| Biomedical Journal                                              | Journal of Perinatology                                               |
| Biosecurity and Bioterrorism                                    | Journal of Periodontology                                             |
| BIOSYSTEMS                                                      | Journal of Pharmacy Practice                                          |
| BIOTECHNOLOGY and BIOTECHNOLOGICAL<br>EQUIPMENT                 | Journal of Plastic, Reconstructive and Aesthetic Surgery              |
| BJOG: An International Journal of Obstetrics and<br>Gynaecology | Journal of Population Therapeutics and Clinical<br>Pharmacology       |
| BJU International                                               | Journal of Practical Oncology                                         |
| Blood purification                                              | Journal of primary care and community health                          |
| BMC Anesthesiology                                              | Journal of Psychiatric Research                                       |
| BMC Cancer                                                      | Journal of Psychosomatic Research                                     |
| BMC Cardiovascular Disorders                                    | Journal of Public Health                                              |
| BMC Clinical Pharmacology                                       | JOURNAL OF PUBLIC HEALTH DENTISTRY                                    |
| BMC Complementary and Alternative Medicine                      | Journal of Radiation Research                                         |
| BMC family practice                                             | Journal of Rehabilitation Medicine                                    |
| BMC Gastroenterology                                            | Journal of research in health sciences                                |
| BMC infectious diseases                                         | Journal of Sexual Medicine                                            |
| BMC Medical Research Methodology                                | Journal of Shoulder and Elbow Surgery                                 |
| BMC Medicine                                                    | Journal of Spinal Disorders and Techniques                            |
| BMC Musculoskeletal Disorders                                   | Journal of Stroke and Cerebrovascular Diseases                        |
| BMC Neurology                                                   | Journal of Studies on Alcohol and Drugs                               |
| BMC ophthalmology                                               | Journal of Substance Abuse Treatment                                  |
| BMC Pediatrics                                                  | Journal of Surgical Oncology                                          |
| BMC pregnancy and childbirth                                    | Journal of Surgical Research                                          |
| BMC Psychiatry                                                  | Journal of Telemedicine and Telecare                                  |
| BMC PUBLIC HEALTH                                               | Journal of the Academy of Nutrition and Dietetics                     |
| BMC research notes                                              | Journal of the American Academy of Audiology                          |
| BMJ                                                             | Journal of the American Academy of Dermatology                        |
| BMJ Open                                                        | Journal of the American College of Cardiology                         |
| BMJ quality and safety                                          | Journal of the American College of Surgeons                           |
| BMJ supportive and palliative care                              | JOURNAL OF THE AMERICAN GERIATRICS SOCIETY                            |
| Boletin Medico del Hospital Infantil de Mexico                  | Journal of the American Medical Directors Association                 |
| Bone                                                            | Journal of the American Medical Informatics<br>Association            |
| bone and joint journal                                          | Journal of the American Pharmacists Association                       |
| Brachytherapy                                                   | Journal of the American Society of Nephrology                         |
| Brazilian Journal of Infectious Diseases                        | Journal of the Balkan Union of Oncology                               |
| Brazilian Journal of Pharmaceutical Sciences                    | Journal of the European Academy of Dermatology and<br>Venereology     |
| Breast Cancer Research and Treatment                            | JOURNAL OF THE FORMOSAN MEDICAL ASSOCIATION                           |
| Breast Cancer: Targets and Therapy                              | Journal of the International Association of Providers of<br>AIDS Care |
| Breast Care                                                     | Journal of the Medical Association of Thailand                        |
| Breastfeeding Medicine                                          | Journal of the National Cancer Institute                              |
| British Journal of Anaesthesia                                  | Journal of the National Comprehensive Cancer<br>Network               |
| British Journal of Cancer                                       | Journal of the Neurological Sciences                                  |
| British Journal of Dermatology                                  |                                                                       |
| British Journal of General Practice                             |                                                                       |

|                                                                  |                                                                                                                   |
|------------------------------------------------------------------|-------------------------------------------------------------------------------------------------------------------|
| British Journal of Haematology                                   | Journal of the Pakistan Medical Association                                                                       |
| British Journal of Ophthalmology                                 | Journal of the Royal Society Interface                                                                            |
| British Journal of Psychiatry                                    | Journal of the Royal Society of Medicine                                                                          |
| British Journal of Sports Medicine                               | Journal of Theoretical Biology                                                                                    |
| British Journal of Surgery                                       | Journal of Thoracic and Cardiovascular Surgery                                                                    |
| Bulletin du Cancer                                               | Journal of Thoracic Oncology                                                                                      |
| Cadernos de Saude Publica                                        | Journal of Thrombosis and Haemostasis                                                                             |
| CADTH technology overviews                                       | Journal of thrombosis and thrombolysis                                                                            |
| Canadian Journal of Cardiology                                   | Journal of Traditional Chinese Medicine                                                                           |
| Canadian Journal of Infectious Diseases and Medical Microbiology | Journal of Trauma and Acute Care Surgery                                                                          |
| Canadian Journal of Ophthalmology                                | Journal of Urban Health                                                                                           |
| Canadian Journal of Surgery                                      | Journal of Urology                                                                                                |
| Canadian Journal of Urology                                      | Journal of vascular and interventional neurology                                                                  |
| Canadian Journal on Aging                                        | Journal of Vascular and Interventional Radiology                                                                  |
| Canadian Medical Association Journal                             | Journal of Vascular Nursing                                                                                       |
| Canadian Urological Association Journal                          | Journal of Vascular Surgery                                                                                       |
| Cancer                                                           | JOURNAL OF VIRAL HEPATITIS                                                                                        |
| Cancer Causes and Control                                        | Journal of Women's Health                                                                                         |
| Cancer Epidemiology Biomarkers and Prevention                    | Journal of wound care                                                                                             |
| Cancer Epidemiology, Biomarkers and Prevention                   | Kardiologia Polska                                                                                                |
| Cancer Prevention Research                                       | KARDIOLOGIYA                                                                                                      |
| Cardiogenetics                                                   | Kidney and Blood Pressure Research                                                                                |
| CardioVascular and Interventional Radiology                      | Klimik Dergisi                                                                                                    |
| Cardiovascular Drugs and Therapy                                 | Klinische Monatsblätter für Augenheilkunde                                                                        |
| Cardiovascular journal of Africa                                 | Klinische P+ndiatrie                                                                                              |
| Cardiovascular Therapeutics                                      | Knee Surgery, Sports Traumatology, Arthroscopy                                                                    |
| Caries Research                                                  | Korean Journal of Thoracic and Cardiovascular Surgery                                                             |
| Catheterization and Cardiovascular Interventions                 | La Radiologia medica                                                                                              |
| Cerebrovascular Diseases                                         | Lancet                                                                                                            |
| Ceska Gynekologie                                                | Lancet Global Health                                                                                              |
| Chest                                                            | Lancet Infectious Diseases                                                                                        |
| Child and Adolescent Psychiatry and Mental Health                | Laryngoscope                                                                                                      |
| Childhood Obesity                                                | Leukemia and Lymphoma                                                                                             |
| Chinese Journal of Cancer Prevention and Treatment               | Lin chuang er bi yan hou tou jing wai ke za zhi = Journal of clinical otorhinolaryngology, head, and neck surgery |
| Chinese Journal of Clinical Nutrition                            | Liver Transplantation                                                                                             |
| Chinese Journal of Clinical Oncology                             | Lung Cancer                                                                                                       |
| Chinese Journal of Evidence-Based Medicine                       | Malaria Journal                                                                                                   |
| Chinese Journal of Lung Cancer                                   | Managed Care                                                                                                      |
| Chinese Journal of New Drugs                                     | Maternal and Child Health Care of China                                                                           |
| Chinese Journal of Oncology                                      | Mathematical Biosciences and Engineering                                                                          |
| Chinese Journal of Schistosomiasis Control                       | Medical Care                                                                                                      |
| Chinese Journal of Tissue Engineering Research                   | MEDICAL HYPOTHESES                                                                                                |
| Chinese Pharmaceutical Journal                                   | MEDICAL JOURNAL OF AUSTRALIA                                                                                      |
| Chinese Preventive Medicine                                      | Medical Journal of Chinese People's Liberation Army                                                               |
| Chongqing Medicine                                               | Medical Journal of Malaysia                                                                                       |
| Ciencia and saude coletiva                                       | Medicina Preventiva                                                                                               |
| Ciencia y Enfermeria                                             | Medicine, Health Care and Philosophy                                                                              |
| Circulation                                                      | Methodist DeBaKey cardiovascular journal                                                                          |
| Circulation: Cardiovascular Quality and Outcomes                 | Midwifery                                                                                                         |
| Circulation: Heart Failure                                       | Modern Preventive Medicine                                                                                        |
| CIRCULATION-CARDIOVASCULAR QUALITY AND OUTCOMES                  | Molecular and Clinical Oncology                                                                                   |
| Cirurgia Espanola                                                | Molecular Diagnosis and Therapy                                                                                   |
| Cirurgia y Cirujanos                                             | MOVEMENT DISORDERS                                                                                                |
| Clinica e Investigacion en Ginecologia y Obstetricia             | Multiple Sclerosis                                                                                                |
| Clinical and Experimental Nephrology                             | Mycoses                                                                                                           |

|                                                        |                                                                        |
|--------------------------------------------------------|------------------------------------------------------------------------|
| Clinical and experimental obstetrics and gynecology    | Nan fang yi ke da xue xue bao = Journal of Southern Medical University |
| Clinical and Experimental Rheumatology                 | National Medical Journal of China                                      |
| Clinical and translational allergy                     | Nephrology Dialysis Transplantation                                    |
| Clinical Breast Cancer                                 | Netherlands Journal of Medicine                                        |
| Clinical Cardiology                                    | Neurologia                                                             |
| Clinical drug investigation                            | Neurologia medico-chirurgica                                           |
| Clinical Gastroenterology and Hepatology               | Neurologist                                                            |
| Clinical Infectious Diseases                           | Neurology                                                              |
| Clinical Journal of Pain                               | Neuro-oncology                                                         |
| Clinical Journal of the American Society of Nephrology | Neurosurgery                                                           |
| Clinical Laboratory                                    | Neurourology and Urodynamics                                           |
| Clinical Medicine Insights: Therapeutics               | New Biotechnology                                                      |
| Clinical Microbiology and Infection                    | NEW ENGLAND JOURNAL OF MEDICINE                                        |
| Clinical Nephrology                                    | Nicotine and Tobacco Research                                          |
| Clinical Neurology and Neurosurgery                    | North Carolina medical journal                                         |
| Clinical Neurophysiology                               | Nutrition and Diabetes                                                 |
| Clinical Nutrition                                     | OBESITY                                                                |
| Clinical Oncology                                      | Obesity Research and Clinical Practice                                 |
| Clinical orthopaedics and related research             | Obesity surgery                                                        |
| Clinical Otolaryngology                                | Obstetrics and Gynecology                                              |
| Clinical pediatrics                                    | Occupation and Health                                                  |
| Clinical Pharmacology and Therapeutics                 | Occupational Medicine                                                  |
| Clinical Rehabilitation                                | Ochsner journal                                                        |
| Clinical Research in Cardiology                        | Oncologist                                                             |
| CLINICAL RHEUMATOLOGY                                  | Oncology                                                               |
| Clinical Therapeutics                                  | Open Respiratory Medicine Journal                                      |
| Clinical Transplantation                               | Open Rheumatology Journal                                              |
| Clinical Trials                                        | Ophthalmic Epidemiology                                                |
| Clinics                                                | Ophthalmologica                                                        |
| CNS Drugs                                              | Ophthalmology                                                          |
| Cochrane Database of Systematic Reviews                | Oral Oncology                                                          |
| Cocuk Enfeksiyon Dergisi                               | Orphanet journal of rare diseases                                      |
| Colorectal Disease                                     | Orthopedics                                                            |
| Community Dental Health                                | Osteoarthritis and Cartilage                                           |
| Community Dentistry and Oral Epidemiology              | Osteoporosis International                                             |
| Community Oncology                                     | Otolaryngology - Head and Neck Surgery                                 |
| Contact Dermatitis                                     | Pacing and Clinical Electrophysiology                                  |
| Contraception                                          | Paediatric Anaesthesia                                                 |
| Crisis                                                 | Paediatrics and Child Health                                           |
| Critical Care Medicine                                 | PAEDIATRICS AND INTERNATIONAL CHILD HEALTH                             |
| Critical Pathways in Cardiology                        | Pain Medicine                                                          |
| Current Alzheimer Research                             | Pain physician                                                         |
| Current Medical Research and Opinion                   | Pain Practice                                                          |
| Current Oncology                                       | Pan African Medical Journal                                            |
| Danish Medical Journal                                 | PARASITES and VECTORS                                                  |
| DARU                                                   | Payesh Health Monitor                                                  |
| Das Gesundheitswesen                                   | PEDIATRIC ALLERGY AND IMMUNOLOGY                                       |
| Dementia and Geriatric Cognitive Disorders             | Pediatric Cardiology                                                   |
| Dermatology                                            | Pediatric Drugs                                                        |
| Dermatology and therapy                                | PEDIATRIC EMERGENCY CARE                                               |
| Diabetes and Vascular Disease Research                 | Pediatric Infectious Disease Journal                                   |
| Diabetes care                                          | Pediatric obesity                                                      |
| Diabetes Research and Clinical Practice                | Pediatric Transplantation                                              |
| Diabetes Technology and Therapeutics                   | Pediatrics                                                             |
| Diabetes Therapy                                       | Pediatrics International                                               |
| Diabetes, Obesity and Metabolism                       | Perioperative Medicine                                                 |
| Diabetic Medicine                                      |                                                                        |

|                                                         |                                                     |
|---------------------------------------------------------|-----------------------------------------------------|
| Digestive and Liver Disease                             | Peritoneal Dialysis International                   |
| Digestive diseases and sciences                         | Personalized Medicine                               |
| Digestive Surgery                                       | Pharmacogenetics and Genomics                       |
| Diseases of the Colon and Rectum                        | Pharmacogenomics                                    |
| DMW Deutsche Medizinische Wochenschrift                 | Pharmacotherapy                                     |
| Drug and Alcohol Dependence                             | Pharmazie                                           |
| Drug Metabolism and Pharmacokinetics                    | Physis: Revista de Saude Coletiva                   |
| Drugs and Aging                                         | Plastic and reconstructive surgery                  |
| Ear and hearing                                         | PLOS MEDICINE                                       |
| ecancermedalscience                                     | PloS Neglected Tropical Diseases                    |
| Eksperimental'naia i klinicheskaia gastroenterologija = | PM and R                                            |
| Experimental and clinical gastroenterology              | Polski Merkuriusz Lekarski                          |
| EMERGENCIAS                                             | Postepy Dermatologii i Alergologii                  |
| Emergency Medicine Journal                              | Postgraduate medicine                               |
| Emerging Infectious Diseases                            | Practical Pharmacy and Clinical Remedies            |
| Endoscopy                                               | Prenatal Diagnosis                                  |
| Enfermedades Infecciosas y Microbiologia Clinica        | Presse Medicale                                     |
| Epidemiology and Infection                              | Preventing chronic disease                          |
| Epidemiology and Psychiatric Science                    | PREVENTION SCIENCE                                  |
| Epilepsia                                               | Preventive Medicine                                 |
| Epilepsy Research                                       | Primary care diabetes                               |
| Europace                                                | Primary Care Respiratory Journal                    |
| European Annals of Otorhinolaryngology, Head and        | Proceedings of the National Academy of Sciences of  |
| Neck Diseases                                           | the United States of America                        |
| European Child and Adolescent Psychiatry                | Progresos de Obstetricia y Ginecologia              |
| European Heart Journal                                  | Progress in Modern Biomedicine                      |
| EUROPEAN HEART JOURNAL-CARDIOVASCULAR                   | Progress in Neuro-Psychopharmacology and Biological |
| IMAGING                                                 | Psychiatry                                          |
| European Journal of Cancer                              | Prostate cancer and prostatic diseases              |
| European Journal of Cardio-Thoracic Surgery             | Psychiatrische Praxis                               |
| European Journal of Clinical Microbiology and           | Psychological Medicine                              |
| Infectious Diseases                                     | Psychologische Rundschau                            |
| European Journal of Clinical Nutrition                  | Psycho-Oncology                                     |
| European Journal of Gastroenterology and Hepatology     | Psychosomatics                                      |
| European Journal of Haematology                         | Psychotherapy Research                              |
| European Journal of Heart Failure                       | Public health nutrition                             |
| European Journal of Hospital Pharmacy: Science and      | QJM                                                 |
| Practice                                                | QUALITY OF LIFE RESEARCH                            |
| European Journal of Human Genetics                      | Radiol. bras                                        |
| European Journal of Integrative Medicine                | Radiological Physics and Technology                 |
| European Journal of Neurology                           | Radiology                                           |
| European Journal of Nuclear Medicine and Molecular      | Rational Pharmacotherapy in Cardiology              |
| Imaging                                                 | Rehabilitacion                                      |
| EUROPEAN JOURNAL OF OBSTETRICS and                      | Renal Failure                                       |
| GYNECOLOGY AND REPRODUCTIVE BIOLOGY                     | Reproductive biomedicine online                     |
| European Journal of Obstetrics Gynecology and           | Research in Autism Spectrum Disorders               |
| Reproductive Biology                                    | Research Journal of Pharmacy and Technology         |
| European Journal of Orthopaedic Surgery and             | Respiratory medicine                                |
| Traumatology                                            | Reumatologia                                        |
| European Journal of Paediatric Neurology                | Reumatologia Clinica                                |
| EUROPEAN JOURNAL OF PAIN                                | Revista Brasileira de Cardiologia Invasiva          |
| European Journal of Preventive Cardiology               | Revista Brasileira de Cirurgia Cardiovascular       |
| European journal of public health                       | Revista Clinica de Medicina de Familia              |
| European Journal of Radiology                           | Revista clinica espanola                            |
| European Journal of Vascular and Endovascular Surgery   | Revista Colombiana de Cardiologia                   |
| European Neurology                                      | Revista Colombiana de Obstetricia y Ginecologia     |
| European Neuropsychopharmacology                        | REVISTA DA ASSOCIACAO MEDICA BRASILEIRA             |

|                                                                         |                                                                  |
|-------------------------------------------------------------------------|------------------------------------------------------------------|
| European Radiology                                                      | Revista de Associacao Medica Brasileira                          |
| European Respiratory Journal                                            | Revista de enfermeria (Barcelona, Spain)                         |
| European Review for Medical and Pharmacological Sciences                | Revista de la Sociedad Espanola del Dolor                        |
| European Spine Journal                                                  | Revista de Salud Publica                                         |
| European Urology                                                        | Revista de Saude Publica                                         |
| Evaluation and Program Planning                                         | Revista espanola de anestesiologia y reanimacion                 |
| Evidence Based Medicine                                                 | Revista Espanola de Cardiologia                                  |
| Experimental and Therapeutic Medicine                                   | Revista Espanola de Cirugia Ortopedica y Traumatologia           |
| Expert Review of Anticancer Therapy                                     | Revista Espanola de Quimioterapia                                |
| Familial Cancer                                                         | Revista Espanola de Salud Publica                                |
| Farmacia Hospitalaria                                                   | Revista Mexicana de Neurociencia                                 |
| Female pelvic medicine and reconstructive surgery                       | Revista Panamericana de Salud Publica                            |
| Fertility and Sterility                                                 | Revista Portuguesa de Cardiologia                                |
| Fisioterapia                                                            | Revista Salud Publica (Bogota)                                   |
| Food and Nutrition Bulletin                                             | Revue de Medecine Interne                                        |
| Foot and Ankle International                                            | Revue de Neuropsychologie, Neurosciences Cognitives et Cliniques |
| Foot and Ankle Surgery                                                  | Revue des maladies respiratoires                                 |
| Fortschritte auf dem Gebiete der Rontgenstrahlen und der Nuklearmedizin | Revue du Rhumatisme (Edition Francaise)                          |
| Forum of Clinical Oncology                                              | Rheumatology                                                     |
| Frontiers in oncology                                                   | Rheumatology International                                       |
| Gastroenterologia y Hepatologia                                         | Risk Analysis                                                    |
| Gastroenterology                                                        | RUSSIAN JOURNAL OF CARDIOLOGY                                    |
| Gastrointestinal Endoscopy                                              | Salud Publica de Mexico                                          |
| Gazzetta Medica Italiana                                                | Salud(i)Ciencia                                                  |
| Genetics in Medicine                                                    | Sarcoma                                                          |
| Gerodontology                                                           | Saudi Medical Journal                                            |
| Ginecologia y Obstetricia de Mexico                                     | Scandinavian Cardiovascular Journal                              |
| GLOBAL HEALTH ACTION                                                    | SCANDINAVIAN JOURNAL OF INFECTIOUS DISEASES                      |
| Global Journal of Health Science                                        | SCANDINAVIAN JOURNAL OF PUBLIC HEALTH                            |
| Global Public Health                                                    | Scandinavian Journal of Urology and Nephrology                   |
| Gut                                                                     | Scandinavian Journal of Work Environment and Health              |
| Gut and Liver                                                           | Schizophrenia Research                                           |
| Gynecologic Endocrinology                                               | Semergen                                                         |
| Gynecologic Oncology                                                    | Seminars in Spine Surgery                                        |
| Haematologica                                                           | Sex Education                                                    |
| Haemophilia                                                             | Sexual Health                                                    |
| Hawaii Journal of Medicine and Public Health                            | Sexually transmitted diseases                                    |
| Health                                                                  | Sexually Transmitted Infections                                  |
| Health Outcomes Research in Medicine                                    | Singapore Medical Journal                                        |
| Health promotion international                                          | Sleep                                                            |
| Health Psychology                                                       | South African Journal of Obstetrics and Gynaecology              |
| Heart                                                                   | South African Medical Journal                                    |
| Heart Lung and Circulation                                              | Spine                                                            |
| Heart Rhythm                                                            | Spine Deformity                                                  |
| Hellenic Journal of Cardiology                                          | Spine Journal                                                    |
| Hematological Oncology                                                  | SpringerPlus                                                     |
| Hematology/ Oncology and Stem Cell Therapy                              | STOCHASTIC ENVIRONMENTAL RESEARCH AND RISK ASSESSMENT            |
| Hepatitis Monthly                                                       | Stroke                                                           |
| Hepato-Gastroenterology                                                 | Supportive Care in Cancer                                        |
| HEPATOLOGY                                                              | Surgery                                                          |
| Hepatology Research                                                     | Surgical Endoscopy                                               |
| Hinyokika kiyo. Acta urologica Japonica                                 | Surgical Endoscopy and Other Interventional Techniques           |
| HIP International                                                       | Surgical Laparoscopy, Endoscopy and Percutaneous                 |
| HIV Clinical Trials                                                     |                                                                  |
| HIV MEDICINE                                                            |                                                                  |



|                                                                         |                                                                                                                                                                        |
|-------------------------------------------------------------------------|------------------------------------------------------------------------------------------------------------------------------------------------------------------------|
| Hong Kong Medical Journal                                               | Techniques                                                                                                                                                             |
| Hormone Research in Paediatrics                                         | Swiss Medical Weekly                                                                                                                                                   |
| Hospital Practice                                                       | Technology in Cancer Research and Treatment                                                                                                                            |
| HPB                                                                     | Telemedicine and e-Health                                                                                                                                              |
| Human Reproduction                                                      | Theoretical biology and medical modelling                                                                                                                              |
| Human Vaccines                                                          | Therapeutic Advances in Psychopharmacology                                                                                                                             |
| Human Vaccines and Immunotherapeutics                                   | Thorax                                                                                                                                                                 |
| Imaging in Medicine                                                     | Thrombosis and Haemostasis                                                                                                                                             |
| Indian Journal of Community Medicine                                    | Thrombosis Journal                                                                                                                                                     |
| Indian Journal of Dermatology                                           | Thrombosis Research                                                                                                                                                    |
| Indian Journal of Medical and Paediatric Oncology                       | Tijdschrift voor Geneeskunde                                                                                                                                           |
| Indian Journal of Pharmacology                                          | Tobacco Control                                                                                                                                                        |
| Indian journal of public health                                         | Toxicon                                                                                                                                                                |
| Infant, Child and Adolescent Nutrition                                  | Toxins                                                                                                                                                                 |
| Infection                                                               | TRANSACTIONS OF THE ROYAL SOCIETY OF TROPICAL<br>MEDICINE AND HYGIENE                                                                                                  |
| Infection Control and Hospital Epidemiology                             | Transfusion                                                                                                                                                            |
| Infectious Diseases in Obstetrics and Gynecology                        | Transfusion and Apheresis Science                                                                                                                                      |
| Inflammatory Bowel Diseases                                             | TRANSPLANT INTERNATIONAL                                                                                                                                               |
| Influenza and other Respiratory Viruses                                 | Transplantation                                                                                                                                                        |
| Injury                                                                  | Transplantation Proceedings                                                                                                                                            |
| Injury Prevention                                                       | Trials                                                                                                                                                                 |
| Insights into Imaging                                                   | Tropical Medicine and International Health                                                                                                                             |
| Intensive care medicine                                                 | Tumor                                                                                                                                                                  |
| Internal medicine journal                                               | Turkderm Deri Hastaliklari ve Frengi Arsivi                                                                                                                            |
| International Brazilian Journal of Urology                              | TURKISH JOURNAL OF MEDICAL SCIENCES                                                                                                                                    |
| International Forum of Allergy and Rhinology                            | Ultrasound in Obstetrics and Gynecology                                                                                                                                |
| International Health                                                    | University of Toronto Medical Journal                                                                                                                                  |
| International Journal for Quality in Health Care                        | Vaccine                                                                                                                                                                |
| International journal of Alzheimer's disease                            | Vakcinologie                                                                                                                                                           |
| International Journal of Antimicrobial Agents                           | Vascular and endovascular surgery                                                                                                                                      |
| International Journal of Cancer                                         | Vector-Borne and Zoonotic Diseases                                                                                                                                     |
| International Journal of Cardiology                                     | Vestnik Dermatologii i Venerologii                                                                                                                                     |
| International journal of chronic obstructive pulmonary<br>disease       | Vojnosanitetski pregled. Military-medical and<br>pharmaceutical review                                                                                                 |
| International journal of clinical pharmacy                              | Voprosy Onkologii                                                                                                                                                      |
| International journal of clinical practice                              | Vox sanguinis                                                                                                                                                          |
| International Journal of COPD                                           | Wiener Klinische Wochenschrift                                                                                                                                         |
| International Journal of Dermatology                                    | Wiener Medizinische Wochenschrift                                                                                                                                      |
| International Journal of Drug Development and<br>Research               | Work                                                                                                                                                                   |
| International Journal of Eating Disorders                               | World Chinese Journal of Digestology                                                                                                                                   |
| International Journal of Environmental Research and<br>Public Health    | World Journal of Emergency Surgery                                                                                                                                     |
| International Journal of Geriatric Psychiatry                           | World Journal of Gastroenterology                                                                                                                                      |
| International Journal of Group Psychotherapy                            | World journal of surgery                                                                                                                                               |
| International Journal of Gynecological Cancer                           | World Journal of Surgical Oncology                                                                                                                                     |
| International Journal of Gynecology and Obstetrics                      | World Neurosurgery                                                                                                                                                     |
| International Journal of Health Care Quality Assurance                  | Wounds                                                                                                                                                                 |
| International journal of inflammation                                   | ZDRAVSTVENO VARSTVO                                                                                                                                                    |
| International Journal of Medical Engineering and<br>Informatics         | Zeitschrift fur Evidenz Fortbildung und Qualitat im<br>Gesundheitswesen                                                                                                |
| International Journal of Nursing Studies                                | Zeitschrift fur Gerontologie und Geriatrie                                                                                                                             |
| International Journal of Obesity                                        | Zhongguo Shiyong Neike Zazhi / Chinese Journal of<br>Practical Internal Medicine                                                                                       |
| International journal of pediatric otorhinolaryngology                  | Zhongguo Xinyao yu Linchuang Zazhi                                                                                                                                     |
| International Journal of Pharmaceutical Sciences<br>Review and Research | Zhongguo Zhong xi yi jie he za zhi Zhongguo Zhongxiyi<br>jiehe zazhi = Chinese journal of integrated traditional<br>and Western medicine / Zhongguo Zhong xi yi jie he |
| International Journal of Pharmacology                                   |                                                                                                                                                                        |

|                                                               |                                                                                                                                                              |
|---------------------------------------------------------------|--------------------------------------------------------------------------------------------------------------------------------------------------------------|
| International Journal of Pharmacy and Pharmaceutical Sciences | xue hui, Zhongguo Zhong yi yan jiu yuan zhu ban                                                                                                              |
| International Journal of Preventive Medicine                  | Zhongguo Zhong yao za zhi = Zhongguo zhongyao zazhi = China journal of Chinese materia medica                                                                |
| International Journal of Radiation Oncology, Biology, Physics | Zhonghua lao dong wei sheng zhi ye bing za zhi = Zhonghua laodong weisheng zhiyebing zazhi = Chinese journal of industrial hygiene and occupational diseases |
| International Journal of Spine Surgery                        |                                                                                                                                                              |
| International Journal of Stroke                               |                                                                                                                                                              |
| International Journal of Tuberculosis and Lung Disease        | Zhonghua liu xing bing xue za zhi = Zhonghua liuxingbingxue zazhi                                                                                            |
| International Journal of Urology                              |                                                                                                                                                              |
| International Journal of Vascular Medicine                    | Zhonghua wei chang wai ke za zhi = Chinese journal of gastrointestinal surgery                                                                               |
| International Orthopaedics                                    |                                                                                                                                                              |
| INTERNATIONAL UROGYNECOLOGY JOURNAL                           | Zhonghua yu fang yi xue za zhi [Chinese journal of preventive medicine]                                                                                      |
| International Wound Journal                                   |                                                                                                                                                              |
| IOVS                                                          | Zhonghua zhong liu za zhi [Chinese journal of oncology]                                                                                                      |

#### Table S4 Search terms to classify cost-utility and cost-benefit analyses

The following search terms were used to classify articles within our final database of full health economic evaluations according to study type. Searches were conducted in titles and abstracts. Search terms could classify an article as a cost-utility analysis, cost-benefit analysis, both, or neither. Articles in our database which did not contain search terms for cost-utility analyses or cost-benefit analyses were categorized as cost-effectiveness analyses. Question marks (“?”) represent a single wildcard character or space.

| Type of analysis             | Search terms implemented in Excel database                                          |
|------------------------------|-------------------------------------------------------------------------------------|
| <b>Cost-utility analysis</b> | Cost?utility<br>[Additionally, all results of DALY and QALY searches also included] |
| <b>CUA employing DALYs</b>   | DALY, Disability?adjusted?life?year                                                 |
| <b>CUA employing QALYs</b>   | QALY, Quality?adjusted?life?year, EQ?5D, SF?36, SF?12, SF?6D                        |
| <b>Cost-benefit analysis</b> | Cost?benefit, benefit?cost, net?benefit, net?monetary?benefit                       |

**Table S5 Search findings by database – all articles and databases**

All searches were conducted on 3 May 2014, except for the LILACS database, which was searched on 12 May 2014. The first database listed identified the largest number of economic evaluations. Remaining databases are listed in order of those which identified the most additional economic evaluations beyond those already identified by other databases higher on the list.

| <b>Database</b>       | <b>Number of records identified by search</b> | <b>Number of economic evaluations meeting inclusion criteria</b> | <b>Sensitivity</b><br>(% of total economic evaluations) | <b>Specificity</b><br>(% of search results classified as economic evaluations) | <b>Additional economic evaluations</b><br><i>(Beyond those found in databases higher on this list)</i> | <b>Cumulative %</b> |
|-----------------------|-----------------------------------------------|------------------------------------------------------------------|---------------------------------------------------------|--------------------------------------------------------------------------------|--------------------------------------------------------------------------------------------------------|---------------------|
| <b>Scopus</b>         | 9006                                          | 2409                                                             | 85%                                                     | 27%                                                                            | 2409                                                                                                   | 85%                 |
| <b>NHS EED</b>        | 3634                                          | 2280                                                             | 80%                                                     | 63%                                                                            | 314                                                                                                    | 96%                 |
| <b>Medline</b>        | 7566                                          | 2254                                                             | 79%                                                     | 30%                                                                            | 65                                                                                                     | 98%                 |
| <b>Global Health</b>  | 2219                                          | 691                                                              | 24%                                                     | 31%                                                                            | 19                                                                                                     | 99%                 |
| <b>Wiley HEED</b>     | 2175                                          | 1707                                                             | 60%                                                     | 78%                                                                            | 13                                                                                                     | 99%                 |
| <b>Web of Science</b> | 8738                                          | 1852                                                             | 65%                                                     | 21%                                                                            | 6                                                                                                      | 99%                 |
| <b>Biosis</b>         | 2643                                          | 834                                                              | 29%                                                     | 32%                                                                            | 5                                                                                                      | 100%                |
| <b>Embase</b>         | 7558                                          | 2217                                                             | 78%                                                     | 29%                                                                            | 4                                                                                                      | 100%                |
| <b>Cinahl</b>         | 2580                                          | 1097                                                             | 39%                                                     | 43%                                                                            | 4                                                                                                      | 100%                |
| <b>Scielo</b>         | 162                                           | 53                                                               | 2%                                                      | 33%                                                                            | 3                                                                                                      | 100%                |
| <b>PsycInfo</b>       | 808                                           | 183                                                              | 6%                                                      | 23%                                                                            | 1                                                                                                      | 100%                |
| <b>EconLit</b>        | 186                                           | 42                                                               | 1%                                                      | 23%                                                                            | 1                                                                                                      | 100%                |
| <b>Lilacs</b>         | 132                                           | 42                                                               | 1%                                                      | 32%                                                                            | 0                                                                                                      | 100%                |
| <b>TOTAL</b>          | 22807                                         | 2844                                                             |                                                         |                                                                                |                                                                                                        |                     |

**Table S6 Search findings by database – excluding NHS EED and Wiley HEED**

All searches were conducted on 3 May 2014, except for the LILACS database, which was searched on 12 May 2014. The first database listed identified the largest number of economic evaluations. Remaining databases are listed in order of those which identified the most additional economic evaluations beyond those already identified by other databases higher on the list. As NHS EED ceased to update records from March 2015 and Wiley HEED ceased to be available from the end of 2014, they have been placed at the bottom of the list to permit examination of available databases.

| <b>Database</b>       | <b>Number of records identified by search</b> | <b>Number of economic evaluations meeting inclusion criteria</b> | <b>Sensitivity</b><br>(% of total economic evaluations) | <b>Specificity</b><br>(% of search results classified as economic evaluations) | <b>Additional economic evaluations</b><br><i>(Beyond those found in databases higher on this list)</i> | <b>Cumulative %</b> |
|-----------------------|-----------------------------------------------|------------------------------------------------------------------|---------------------------------------------------------|--------------------------------------------------------------------------------|--------------------------------------------------------------------------------------------------------|---------------------|
| <b>Scopus</b>         | 9006                                          | 2409                                                             | 85%                                                     | 27%                                                                            | 2409                                                                                                   | 85%                 |
| <b>Medline</b>        | 7566                                          | 2254                                                             | 79%                                                     | 30%                                                                            | 156                                                                                                    | 90%                 |
| <b>Global Health</b>  | 2219                                          | 691                                                              | 24%                                                     | 31%                                                                            | 35                                                                                                     | 91%                 |
| <b>Web of Science</b> | 8738                                          | 1852                                                             | 65%                                                     | 21%                                                                            | 22                                                                                                     | 92%                 |
| <b>Embase</b>         | 7558                                          | 2217                                                             | 78%                                                     | 29%                                                                            | 14                                                                                                     | 93%                 |
| <b>Biosis</b>         | 2643                                          | 834                                                              | 29%                                                     | 32%                                                                            | 7                                                                                                      | 92%                 |
| <b>Cinahl</b>         | 2580                                          | 1097                                                             | 39%                                                     | 43%                                                                            | 5                                                                                                      | 93%                 |
| <b>Scielo</b>         | 162                                           | 53                                                               | 2%                                                      | 33%                                                                            | 3                                                                                                      | 93%                 |
| <b>EconLit</b>        | 186                                           | 42                                                               | 1%                                                      | 23%                                                                            | 1                                                                                                      | 93%                 |
| <b>PsycInfo</b>       | 808                                           | 183                                                              | 6%                                                      | 23%                                                                            | 1                                                                                                      | 93%                 |
| <b>Lilacs</b>         | 132                                           | 42                                                               | 1%                                                      | 32%                                                                            | 0                                                                                                      | 93%                 |
| <b>(NHS EED)</b>      | <i>(3634)</i>                                 | <i>(2280)</i>                                                    | <i>(80%)</i>                                            | <i>(63%)</i>                                                                   | <i>(183)</i>                                                                                           | <i>(100%)</i>       |
| <b>(Wiley HEED)</b>   | <i>(2175)</i>                                 | <i>(1707)</i>                                                    | <i>(60%)</i>                                            | <i>(78%)</i>                                                                   | <i>(8)</i>                                                                                             | <i>(100%)</i>       |
| <b>TOTAL</b>          | 22807                                         | 2844                                                             |                                                         |                                                                                |                                                                                                        |                     |

**Table S7 Search findings by database – only articles studying low- and middle-income countries, excluding NHS EED and Wiley HEED**

All searches were conducted on 3 May 2014, except for the LILACS database, which was searched on 12 May 2014. The first database listed identified the largest number of economic evaluations. Remaining databases are listed in order of those which identified the most additional economic evaluations beyond those already identified by other databases higher on the list. L&MIC: Low- and middle-income country. As NHS EED ceased to update records from March 2015 and Wiley HEED ceased to be available from the end of 2014, they have been placed at the bottom of the list to permit examination of available databases.

| <b>Database</b>       | <b>Number of records identified by search</b> | <b>Number of L&amp;MIC economic evaluations meeting inclusion criteria</b> | <b>Sensitivity (% of total L&amp;MIC economic evaluations)</b> | <b>Specificity (% of search results classified as L&amp;MIC economic evaluations)</b> | <b>Additional L&amp;MIC economic evaluations<br/>(Beyond those found in databases higher on this list)</b> | <b>Cumulative %</b> |
|-----------------------|-----------------------------------------------|----------------------------------------------------------------------------|----------------------------------------------------------------|---------------------------------------------------------------------------------------|------------------------------------------------------------------------------------------------------------|---------------------|
| <b>Scopus</b>         | 9006                                          | 428                                                                        | 81%                                                            | 5%                                                                                    | 428                                                                                                        | 81%                 |
| <b>Medline</b>        | 7566                                          | 380                                                                        | 72%                                                            | 5%                                                                                    | 40                                                                                                         | 89%                 |
| <b>Global Health</b>  | 2219                                          | 287                                                                        | 54%                                                            | 13%                                                                                   | 23                                                                                                         | 93%                 |
| <b>Biosis</b>         | 2643                                          | 181                                                                        | 34%                                                            | 7%                                                                                    | 4                                                                                                          | 94%                 |
| <b>Embase</b>         | 7558                                          | 403                                                                        | 76%                                                            | 5%                                                                                    | 4                                                                                                          | 95%                 |
| <b>Web of Science</b> | 8738                                          | 316                                                                        | 60%                                                            | 4%                                                                                    | 3                                                                                                          | 95%                 |
| <b>Cinahl</b>         | 2580                                          | 119                                                                        | 23%                                                            | 5%                                                                                    | 1                                                                                                          | 95%                 |
| <b>Scielo</b>         | 162                                           | 43                                                                         | 8%                                                             | 27%                                                                                   | 1                                                                                                          | 96%                 |
| <b>Lilacs</b>         | 132                                           | 39                                                                         | 7%                                                             | 30%                                                                                   | 0                                                                                                          | 96%                 |
| <b>PsycInfo</b>       | 808                                           | 21                                                                         | 4%                                                             | 3%                                                                                    | 0                                                                                                          | 96%                 |
| <b>EconLit</b>        | 186                                           | 6                                                                          | 1%                                                             | 3%                                                                                    | 0                                                                                                          | 96%                 |
| <b>(NHS EED)</b>      | <i>(3634)</i>                                 | <i>(378)</i>                                                               | <i>(72%)</i>                                                   | <i>(10%)</i>                                                                          | <i>(21)</i>                                                                                                | <i>(100%)</i>       |
| <b>(Wiley HEED)</b>   | <i>(2175)</i>                                 | <i>(294)</i>                                                               | <i>(56%)</i>                                                   | <i>(14%)</i>                                                                          | <i>(2)</i>                                                                                                 | <i>(100%)</i>       |
| <b>TOTAL</b>          | 47407                                         | 527                                                                        |                                                                |                                                                                       |                                                                                                            |                     |

Table S8 Journal concentration by income group of countries studied

|                                          | LICs | Lower-MICs | Upper-MICs | HICs | All  |
|------------------------------------------|------|------------|------------|------|------|
| <b>Total articles</b>                    | 104  | 121        | 391        | 2350 | 2844 |
| <b>Avg articles per journal</b>          | 2.4  | 2.0        | 1.7        | 2.9  | 2.9  |
| <b>Total journals</b>                    | 44   | 61         | 226        | 802  | 967  |
| <b>% articles in top 10 journals</b>     | 62%  | 52%        | 27%        | 22%  | 21%  |
| <b>Total articles in top 10 journals</b> | 64   | 63         | 105        | 509  | 600  |
| <b>% articles in top 20 journals</b>     | 77%  | 66%        | 38%        | 29%  | 29%  |
| <b>Total articles in top 20 journals</b> | 80   | 80         | 147        | 684  | 813  |

**Table S9 Number and proportion of economic evaluations by type and income group**

In this table, “cost-effectiveness analyses” refers to articles meeting our definition of a full economic evaluation but not containing any keywords to define it more specifically as a cost-utility or cost-benefit analysis. Articles can be classified as both cost-utility and cost-benefit analyses if they contain keywords for both. DALY: disability-adjusted life year, QALY: quality-adjusted life-year.

|                                                 | Income group studied |             |            |             |            |             |             |             |                        |               |             |             |
|-------------------------------------------------|----------------------|-------------|------------|-------------|------------|-------------|-------------|-------------|------------------------|---------------|-------------|-------------|
|                                                 | LICs                 |             | Lower-MICs |             | Upper-MICs |             | HICs        |             | Multiple income groups |               | Total       |             |
| Type of analysis                                | N                    | %           | N          | %           | N          | %           | N           | %           | N                      | %             | N           | %           |
| <b>Cost-utility analysis (only)</b>             | 51                   | 49%         | 63         | 52%         | 172        | 44%         | 1391        | 59%         | 39                     | 61.9%         | <b>1605</b> | 56%         |
| <i>DALY</i>                                     | 44                   | 42%         | 40         | 33%         | 49         | 13%         | 34          | 1%          | 28                     | 44.4%         | <b>112</b>  | 4%          |
| <i>QALY</i>                                     | 7                    | 7%          | 22         | 18%         | 120        | 31%         | 1332        | 57%         | 10                     | 15.9%         | <b>1465</b> | 52%         |
| <b>Cost-benefit analysis (only)</b>             | 5                    | 5%          | 3          | 2%          | 13         | 3%          | 60          | 3%          | 1                      | 1.6%          | <b>79</b>   | 3%          |
| <b>Cost-benefit &amp; cost-utility analysis</b> | 1                    | 1.0%        | 3          | 2.5%        | 10         | 2.6%        | 57          | 2.4%        | 1                      | 1.6%          | <b>68</b>   | 2%          |
| <b>Cost-effectiveness analysis</b>              | 47                   | 45%         | 52         | 43%         | 196        | 50%         | 842         | 36%         | 22                     | 34.9%         | <b>1092</b> | 38%         |
| <b>Total</b>                                    | <b>104</b>           | <b>100%</b> | <b>121</b> | <b>100%</b> | <b>391</b> | <b>100%</b> | <b>2350</b> | <b>100%</b> | <b>63</b>              | <b>100.0%</b> | <b>2844</b> | <b>100%</b> |
|                                                 | %                    | 3.7%        | 4.3%       |             | 13.7%      |             | 82.6%       |             | 2.2%                   |               | 100.0%      |             |



## References

- LIBERATI, A., ALTMAN, D. G., TETZLAFF, J., MULROW, C., GOTZSCHE, P. C., IOANNIDIS, J. P., CLARKE, M., DEVEREAUX, P. J., KLEIJNEN, J. & MOHER, D. 2009. The PRISMA statement for reporting systematic reviews and meta-analyses of studies that evaluate health care interventions: explanation and elaboration. *J Clin Epidemiol*, 62, e1-34.
- WORLD HEALTH ORGANIZATION. 2011. *International statistical classification of diseases and related health problems, 10th revision, edition 2010*, Geneva, World Health Organization.
- WORLD HEALTH ORGANIZATION. 2014. Global Health Estimates 2014 Summary Tables: DALY by cause, age and sex, by World Bank income group category, 2000-2012. Geneva: World Health Organization.
